# Supplementary material for: ONECUT2 governs the POU6F2-beta-catenin axis to modulate cancer stemness and drives the CCL28-dependent pathway for macrophage polarization in breast cancer
Source: Research Square preprint supplement (doi:10.21203/rs.3.rs-7518380/v1), 2025-10-15
Supplement: Supplementary file 1 [file 008f79db83cc2e19a5249fb5.xlsx]

## Sheet: Potential target genes of OC-2
ID	Gene symbol	Ensembl ID	SiteCount
ENSG00000111328	CDK2AP1	ENST00000261692	4
ENSG00000111652	COPS7A	ENST00000229251	4
ENSG00000115977	AAK1	ENST00000461002	4
ENSG00000150347	ARID5B	ENST00000279873	4
ENSG00000151065	DCP1B	ENST00000280665	4
ENSG00000156853	ZNF689	ENST00000565710	4
ENSG00000162604	TM2D1	ENST00000371177	4
ENSG00000175581	MRPL48	ENST00000310614	4
ENSG00000175595	ERCC4	ENST00000311895	4
ENSG00000200156	RNU5B-1	ENST00000363286	4
ENSG00000203585	RP11-542B15.1	ENST00000400306	4
ENSG00000229337	AC079305.8	ENST00000455416	4
ENSG00000229878	RP11-479G22.7	ENST00000423444	4
ENSG00000005020	SKAP2	ENST00000432747	3
ENSG00000006007	GDE1	ENST00000353258	3
ENSG00000009307	CSDE1	ENST00000525878	3
ENSG00000010803	SCMH1	ENST00000397174	3
ENSG00000030419	IKZF2	ENST00000374319	3
ENSG00000035499	DEPDC1B	ENST00000265036	3
ENSG00000036565	SLC18A1	ENST00000276373	3
ENSG00000047617	ANO2	ENST00000542326	3
ENSG00000068438	FTSJ1	ENST00000019019	3
ENSG00000070759	TESK2	ENST00000372084	3
ENSG00000074054	CLASP1	ENST00000485112	3
ENSG00000077684	JADE1	ENST00000413543	3
ENSG00000087128	TMPRSS11E	ENST00000305363	3
ENSG00000100439	ABHD4	ENST00000545034	3
ENSG00000100519	PSMC6	ENST00000557632	3
ENSG00000100592	DAAM1	ENST00000553307	3
ENSG00000104164	BLOC1S6	ENST00000564765	3
ENSG00000107242	PIP5K1B	ENST00000437200	3
ENSG00000107863	ARHGAP21	ENST00000636842	3
ENSG00000108423	TUBD1	ENST00000325752	3
ENSG00000108443	RPS6KB1	ENST00000225577	3
ENSG00000108854	SMURF2	ENST00000580072	3
ENSG00000111596	CNOT2	ENST00000550705	3
ENSG00000112118	MCM3	ENST00000229854	3
ENSG00000113368	LMNB1	ENST00000463908	3
ENSG00000113448	PDE4D	ENST00000502484	3
ENSG00000116560	SFPQ	ENST00000357214	3
ENSG00000116667	C1orf21	ENST00000477517	3
ENSG00000117139	KDM5B	ENST00000367264	3
ENSG00000120159	CAAP1	ENST00000625311	3
ENSG00000123091	RNF11	ENST00000242719	3
ENSG00000128908	INO80	ENST00000361937	3
ENSG00000129422	MTUS1	ENST00000520196	3
ENSG00000130254	SAFB2	ENST00000591120	3
ENSG00000131508	UBE2D2	ENST00000398733	3
ENSG00000132466	ANKRD17	ENST00000513908	3
ENSG00000134278	SPIRE1	ENST00000498803	3
ENSG00000134453	RBM17	ENST00000379888	3
ENSG00000137713	PPP2R1B	ENST00000529672	3
ENSG00000137770	CTDSPL2	ENST00000559175	3
ENSG00000142534	RPS11	ENST00000594493	3
ENSG00000142875	PRKACB	ENST00000467507	3
ENSG00000142949	PTPRF	ENST00000359947	3
ENSG00000143199	ADCY10	ENST00000545172	3
ENSG00000143621	ILF2	ENST00000368681	3
ENSG00000144048	DUSP11	ENST00000272444	3
ENSG00000144395	CCDC150	ENST00000495513	3
ENSG00000148120	C9orf3	ENST00000468164	3
ENSG00000148965	SAA4	ENST00000278222	3
ENSG00000151150	ANK3	ENST00000489505	3
ENSG00000153292	ADGRF1	ENST00000283297	3
ENSG00000155755	TMEM237	ENST00000463205	3
ENSG00000162039	MEIOB	ENST00000470044	3
ENSG00000163541	SUCLG1	ENST00000491642	3
ENSG00000163714	U2SURP	ENST00000472373	3
ENSG00000163728	TTC14	ENST00000296015	3
ENSG00000164749	HNF4G	ENST00000494318	3
ENSG00000165630	PRPF18	ENST00000320054	3
ENSG00000165816	VWA2	ENST00000298715	3
ENSG00000170265	ZNF282	ENST00000462740	3
ENSG00000170852	KBTBD2	ENST00000477129	3
ENSG00000171202	TMEM126A	ENST00000304511	3
ENSG00000173838	2025-03-10	ENST00000456609	3
ENSG00000174276	ZNHIT2	ENST00000528598	3
ENSG00000174891	RSRC1	ENST00000295930	3
ENSG00000175536	LIPT2	ENST00000527115	3
ENSG00000178921	PFAS	ENST00000585319	3
ENSG00000179021	C3orf38	ENST00000486971	3
ENSG00000180304	OAZ2	ENST00000559753	3
ENSG00000180773	SLC36A4	ENST00000534116	3
ENSG00000184445	KNTC1	ENST00000333479	3
ENSG00000187240	DYNC2H1	ENST00000375735	3
ENSG00000196712	NF1	ENST00000495910	3
ENSG00000202523	Y_RNA	ENST00000365653	3
ENSG00000203593	RP5-1096D14.6	ENST00000354425	3
ENSG00000204388	HSPA1B	ENST00000375650	3
ENSG00000205189	ZBTB10	ENST00000379091	3
ENSG00000205955	HSP90AA5P	ENST00000438353	3
ENSG00000206595	RNU6-877P	ENST00000383868	3
ENSG00000207383	Y_RNA	ENST00000384653	3
ENSG00000211456	SACM1L	ENST00000389061	3
ENSG00000213782	DDX47	ENST00000392155	3
ENSG00000215021	PHB2	ENST00000440277	3
ENSG00000215256	DHRS4-AS1	ENST00000554036	3
ENSG00000217930	PAM16	ENST00000575884	3
ENSG00000223745	CCDC18-AS1	ENST00000415150	3
ENSG00000226289	CDCA4P3	ENST00000442572	3
ENSG00000226447	RP11-393J16.4	ENST00000412789	3
ENSG00000230530	LIMD1-AS1	ENST00000427644	3
ENSG00000232846	SLC25A6P3	ENST00000424829	3
ENSG00000235083	RP11-669M2.2	ENST00000446368	3
ENSG00000237457	LINC01351	ENST00000424735	3
ENSG00000237596	RP13-143G15.4	ENST00000626414	3
ENSG00000240518	RP11-515C16.1	ENST00000489727	3
ENSG00000240963	RP11-518L10.5	ENST00000417765	3
ENSG00000243176	RP11-550I24.2	ENST00000460796	3
ENSG00000243402	RP11-473O4.1	ENST00000490340	3
ENSG00000247626	MARS2	ENST00000282276	3
ENSG00000249947	XBP1P1	ENST00000436573	3
ENSG00000250567	CTD-2154H6.1	ENST00000507948	3
ENSG00000253719	ATXN7L3B	ENST00000519948	3
ENSG00000255272	RP11-646J21.6	ENST00000528779	3
ENSG00000258292	RP11-536G4.1	ENST00000553095	3
ENSG00000258957	RP11-363J20.1	ENST00000554898	3
ENSG00000259146	RP1-261D10.2	ENST00000555771	3
ENSG00000260239	RP11-274H24.1	ENST00000563079	3
ENSG00000267690	LDLRAD4-AS1	ENST00000588672	3
ENSG00000271009	RP11-346C20.3	ENST00000604855	3
ENSG00000271253	CTD-2320J21.1	ENST00000604949	3
ENSG00000273149	RP11-290D2.6	ENST00000610057	3
ENSG00000281219	LINC00254	ENST00000563416	3
ENSG00000000003	TSPAN6	ENST00000496771	2
ENSG00000001460	STPG1	ENST00000498488	2
ENSG00000003509	NDUFAF7	ENST00000474257	2
ENSG00000004455	AK2	ENST00000354858	2
ENSG00000004478	FKBP4	ENST00000001008	2
ENSG00000004766	VPS50	ENST00000474412	2
ENSG00000004799	PDK4	ENST00000468445	2
ENSG00000005108	THSD7A	ENST00000423059	2
ENSG00000005194	CIAPIN1	ENST00000563341	2
ENSG00000005700	IBTK	ENST00000508381	2
ENSG00000005884	ITGA3	ENST00000320031	2
ENSG00000006194	ZNF263	ENST00000219069	2
ENSG00000006652	IFRD1	ENST00000443101	2
ENSG00000006715	VPS41	ENST00000413141	2
ENSG00000007174	DNAH9	ENST00000262442	2
ENSG00000007341	ST7L	ENST00000418497	2
ENSG00000008394	MGST1	ENST00000538885	2
ENSG00000010072	SPRTN	ENST00000008440	2
ENSG00000010361	FUZ	ENST00000313777	2
ENSG00000010610	CD4	ENST00000543755	2
ENSG00000011198	ABHD5	ENST00000013894	2
ENSG00000011426	ANLN	ENST00000491782	2
ENSG00000011454	RABGAP1	ENST00000485090	2
ENSG00000012817	KDM5D	ENST00000382806	2
ENSG00000013374	NUB1	ENST00000460712	2
ENSG00000013441	CLK1	ENST00000461981	2
ENSG00000014641	MDH1	ENST00000233114	2
ENSG00000021461	CYP3A43	ENST00000222382	2
ENSG00000021574	SPAST	ENST00000315285	2
ENSG00000023330	ALAS1	ENST00000310271	2
ENSG00000023697	DERA	ENST00000524480	2
ENSG00000023909	GCLM	ENST00000615724	2
ENSG00000026508	CD44	ENST00000278385	2
ENSG00000029363	BCLAF1	ENST00000476194	2
ENSG00000031003	FAM13B	ENST00000505961	2
ENSG00000032219	ARID4A	ENST00000469635	2
ENSG00000032389	TSSC1	ENST00000382125	2
ENSG00000033627	ATP6V0A1	ENST00000592324	2
ENSG00000033867	SLC4A7	ENST00000425128	2
ENSG00000034152	MAP2K3	ENST00000613338	2
ENSG00000037637	FBXO42	ENST00000478089	2
ENSG00000038210	PI4K2B	ENST00000264864	2
ENSG00000038945	MSR1	ENST00000520846	2
ENSG00000039068	CDH1	ENST00000567320	2
ENSG00000042317	SPATA7	ENST00000393545	2
ENSG00000046889	PREX2	ENST00000520235	2
ENSG00000047365	ARAP2	ENST00000512804	2
ENSG00000047410	TPR	ENST00000467810	2
ENSG00000048649	RSF1	ENST00000526324	2
ENSG00000048991	R3HDM1	ENST00000480793	2
ENSG00000049247	UTS2	ENST00000361696	2
ENSG00000049323	LTBP1	ENST00000498013	2
ENSG00000051825	MPHOSPH9	ENST00000536198	2
ENSG00000052126	PLEKHA5	ENST00000535357	2
ENSG00000054116	TRAPPC3	ENST00000373159	2
ENSG00000055044	NOP58	ENST00000478941	2
ENSG00000057657	PRDM1	ENST00000450060	2
ENSG00000057663	ATG5	ENST00000613993	2
ENSG00000058272	PPP1R12A	ENST00000547253	2
ENSG00000058804	NDC1	ENST00000371429	2
ENSG00000060138	YBX3	ENST00000228251	2
ENSG00000060237	WNK1	ENST00000540360	2
ENSG00000060982	BCAT1	ENST00000612790	2
ENSG00000062716	VMP1	ENST00000587470	2
ENSG00000062725	APPBP2	ENST00000083182	2
ENSG00000063245	EPN1	ENST00000411543	2
ENSG00000064545	TMEM161A	ENST00000162044	2
ENSG00000064763	FAR2	ENST00000547759	2
ENSG00000064995	TAF11	ENST00000420584	2
ENSG00000065029	ZNF76	ENST00000339411	2
ENSG00000065243	PKN2	ENST00000495119	2
ENSG00000065534	MYLK	ENST00000504946	2
ENSG00000065621	GSTO2	ENST00000498052	2
ENSG00000065809	FAM107B	ENST00000475786	2
ENSG00000066084	DIP2B	ENST00000301180	2
ENSG00000066135	KDM4A	ENST00000372396	2
ENSG00000066739	ATG2B	ENST00000554151	2
ENSG00000070669	ASNS	ENST00000462436	2
ENSG00000070756	PABPC1	ENST00000518716	2
ENSG00000071794	HLTF	ENST00000497427	2
ENSG00000072201	LNX1	ENST00000504299	2
ENSG00000072364	AFF4	ENST00000265343	2
ENSG00000072786	STK10	ENST00000176763	2
ENSG00000072958	AP1M1	ENST00000291439	2
ENSG00000073921	PICALM	ENST00000532603	2
ENSG00000074201	CLNS1A	ENST00000533957	2
ENSG00000074319	TSG101	ENST00000251968	2
ENSG00000074603	DPP8	ENST00000300141	2
ENSG00000074935	TUBE1	ENST00000603651	2
ENSG00000075856	SART3	ENST00000431469	2
ENSG00000075975	MKRN2	ENST00000170447	2
ENSG00000076003	MCM6	ENST00000264156	2
ENSG00000076555	ACACB	ENST00000544651	2
ENSG00000077380	DYNC1I2	ENST00000476551	2
ENSG00000077514	POLD3	ENST00000528481	2
ENSG00000078674	PCM1	ENST00000518985	2
ENSG00000078747	ITCH	ENST00000461661	2
ENSG00000079134	THOC1	ENST00000584642	2
ENSG00000079215	SLC1A3	ENST00000505202	2
ENSG00000080371	RAB21	ENST00000552686	2
ENSG00000080503	SMARCA2	ENST00000416751	2
ENSG00000080546	SESN1	ENST00000356644	2
ENSG00000080824	HSP90AA1	ENST00000555662	2
ENSG00000081041	CXCL2	ENST00000296031	2
ENSG00000081189	MEF2C	ENST00000636336	2
ENSG00000081377	CDC14B	ENST00000480920	2
ENSG00000081913	PHLPP1	ENST00000487409	2
ENSG00000082212	ME2	ENST00000321341	2
ENSG00000082438	COBLL1	ENST00000493921	2
ENSG00000082701	GSK3B	ENST00000264235	2
ENSG00000082781	ITGB5	ENST00000476988	2
ENSG00000082805	ERC1	ENST00000588412	2
ENSG00000083799	CYLD	ENST00000427738	2
ENSG00000083807	SLC27A5	ENST00000594786	2
ENSG00000084073	ZMPSTE24	ENST00000372759	2
ENSG00000085377	PREP	ENST00000369110	2
ENSG00000085415	SEH1L	ENST00000592170	2
ENSG00000085832	EPS15	ENST00000493793	2
ENSG00000086015	MAST2	ENST00000467367	2
ENSG00000086619	ERO1B	ENST00000264181	2
ENSG00000086696	HSD17B2	ENST00000563491	2
ENSG00000087274	ADD1	ENST00000541051	2
ENSG00000087365	SF3B2	ENST00000530981	2
ENSG00000087586	AURKA	ENST00000312783	2
ENSG00000088682	COQ9	ENST00000262507	2
ENSG00000088766	CRLS1	ENST00000378863	2
ENSG00000089022	MAPKAPK5	ENST00000550735	2
ENSG00000089048	ESF1	ENST00000202816	2
ENSG00000090266	NDUFB2	ENST00000479181	2
ENSG00000091879	ANGPT2	ENST00000523120	2
ENSG00000092203	TOX4	ENST00000416256	2
ENSG00000093000	NUP50	ENST00000419387	2
ENSG00000094916	CBX5	ENST00000439541	2
ENSG00000095564	BTAF1	ENST00000476401	2
ENSG00000096006	CRISP3	ENST00000263045	2
ENSG00000096717	SIRT1	ENST00000403579	2
ENSG00000096872	IFT74	ENST00000380062	2
ENSG00000097021	ACOT7	ENST00000377845	2
ENSG00000099204	ABLIM1	ENST00000369252	2
ENSG00000100100	PIK3IP1	ENST00000215912	2
ENSG00000100227	POLDIP3	ENST00000252115	2
ENSG00000100350	FOXRED2	ENST00000216187	2
ENSG00000100354	TNRC6B	ENST00000335727	2
ENSG00000100372	SLC25A17	ENST00000402844	2
ENSG00000100376	FAM118A	ENST00000427777	2
ENSG00000100478	AP4S1	ENST00000555417	2
ENSG00000100490	CDKL1	ENST00000525911	2
ENSG00000100503	NIN	ENST00000389869	2
ENSG00000100526	CDKN3	ENST00000216414	2
ENSG00000100528	CNIH1	ENST00000216416	2
ENSG00000100532	CGRRF1	ENST00000216420	2
ENSG00000100578	KIAA0586	ENST00000556235	2
ENSG00000100614	PPM1A	ENST00000531937	2
ENSG00000100711	ZFYVE21	ENST00000602552	2
ENSG00000100813	ACIN1	ENST00000605057	2
ENSG00000100906	NFKBIA	ENST00000216797	2
ENSG00000100983	GSS	ENST00000216951	2
ENSG00000101138	CSTF1	ENST00000452950	2
ENSG00000101247	NDUFAF5	ENST00000378081	2
ENSG00000101266	CSNK2A1	ENST00000619801	2
ENSG00000101294	HM13	ENST00000335574	2
ENSG00000101310	SEC23B	ENST00000422877	2
ENSG00000101413	RPRD1B	ENST00000614670	2
ENSG00000101695	RNF125	ENST00000217740	2
ENSG00000101940	WDR13	ENST00000472440	2
ENSG00000102024	PLS3	ENST00000473026	2
ENSG00000102081	FMR1	ENST00000492846	2
ENSG00000102710	SUPT20H	ENST00000542180	2
ENSG00000102763	VWA8	ENST00000478987	2
ENSG00000102796	DHRS12	ENST00000461948	2
ENSG00000102804	TSC22D1	ENST00000261489	2
ENSG00000102805	CLN5	ENST00000636520	2
ENSG00000103064	SLC7A6	ENST00000562727	2
ENSG00000103091	WDR59	ENST00000569788	2
ENSG00000103194	USP10	ENST00000563433	2
ENSG00000103353	UBFD1	ENST00000569919	2
ENSG00000103365	GGA2	ENST00000568922	2
ENSG00000103528	SYT17	ENST00000568433	2
ENSG00000103852	TTC23	ENST00000459771	2
ENSG00000103966	EHD4	ENST00000220325	2
ENSG00000103978	TMEM87A	ENST00000561578	2
ENSG00000103995	CEP152	ENST00000559398	2
ENSG00000104133	SPG11	ENST00000558561	2
ENSG00000104205	SGK3	ENST00000519396	2
ENSG00000104231	ZFAND1	ENST00000517353	2
ENSG00000104331	IMPAD1	ENST00000520392	2
ENSG00000104341	LAPTM4B	ENST00000517924	2
ENSG00000104361	NIPAL2	ENST00000341166	2
ENSG00000104388	RAB2A	ENST00000530071	2
ENSG00000104408	EIF3E	ENST00000220849	2
ENSG00000104549	SQLE	ENST00000265896	2
ENSG00000104760	FGL1	ENST00000518769	2
ENSG00000104884	ERCC2	ENST00000391941	2
ENSG00000104946	TBC1D17	ENST00000221543	2
ENSG00000104957	CCDC130	ENST00000540216	2
ENSG00000104980	TIMM44	ENST00000270538	2
ENSG00000105248	CCDC94	ENST00000262962	2
ENSG00000105383	CD33	ENST00000600557	2
ENSG00000105447	GRWD1	ENST00000253237	2
ENSG00000105499	PLA2G4C	ENST00000354276	2
ENSG00000105647	PIK3R2	ENST00000222254	2
ENSG00000105701	FKBP8	ENST00000597611	2
ENSG00000105792	CFAP69	ENST00000412839	2
ENSG00000105835	NAMPT	ENST00000467730	2
ENSG00000105939	ZC3HAV1	ENST00000464606	2
ENSG00000105983	LMBR1	ENST00000448926	2
ENSG00000106086	PLEKHA8	ENST00000258679	2
ENSG00000106144	CASP2	ENST00000350623	2
ENSG00000106236	NPTX2	ENST00000466102	2
ENSG00000106336	FBXO24	ENST00000427939	2
ENSG00000106443	PHF14	ENST00000403050	2
ENSG00000106462	EZH2	ENST00000483012	2
ENSG00000106571	GLI3	ENST00000479210	2
ENSG00000106688	SLC1A1	ENST00000422398	2
ENSG00000106829	TLE4	ENST00000455913	2
ENSG00000106952	TNFSF8	ENST00000474301	2
ENSG00000107201	DDX58	ENST00000379868	2
ENSG00000107581	EIF3A	ENST00000369144	2
ENSG00000107643	MAPK8	ENST00000482840	2
ENSG00000107758	PPP3CB	ENST00000342558	2
ENSG00000107864	CPEB3	ENST00000412050	2
ENSG00000107897	ACBD5	ENST00000375901	2
ENSG00000108107	RPL28	ENST00000428193	2
ENSG00000108298	RPL19	ENST00000225430	2
ENSG00000108375	RNF43	ENST00000407977	2
ENSG00000108515	ENO3	ENST00000522798	2
ENSG00000108602	ALDH3A1	ENST00000574162	2
ENSG00000108883	EFTUD2	ENST00000585616	2
ENSG00000108963	DPH1	ENST00000263083	2
ENSG00000108984	MAP2K6	ENST00000588110	2
ENSG00000109171	SLAIN2	ENST00000505131	2
ENSG00000109181	UGT2B10	ENST00000265403	2
ENSG00000109332	UBE2D3	ENST00000349311	2
ENSG00000109458	GAB1	ENST00000511836	2
ENSG00000109606	DHX15	ENST00000512903	2
ENSG00000109670	FBXW7	ENST00000281708	2
ENSG00000109943	CRTAM	ENST00000533709	2
ENSG00000110172	CHORDC1	ENST00000320585	2
ENSG00000110321	EIF4G2	ENST00000525681	2
ENSG00000110711	AIP	ENST00000279146	2
ENSG00000110723	EXPH5	ENST00000265843	2
ENSG00000110888	CAPRIN2	ENST00000553026	2
ENSG00000110955	ATP5B	ENST00000548474	2
ENSG00000111011	RSRC2	ENST00000331738	2
ENSG00000111058	ACSS3	ENST00000616449	2
ENSG00000111231	GPN3	ENST00000228827	2
ENSG00000111371	SLC38A1	ENST00000548979	2
ENSG00000111615	KRR1	ENST00000229214	2
ENSG00000111728	ST8SIA1	ENST00000544732	2
ENSG00000111785	RIC8B	ENST00000355478	2
ENSG00000111790	FGFR1OP2	ENST00000538172	2
ENSG00000111802	TDP2	ENST00000378198	2
ENSG00000111817	DSE	ENST00000430252	2
ENSG00000111875	ASF1A	ENST00000229595	2
ENSG00000112062	MAPK14	ENST00000310795	2
ENSG00000112137	PHACTR1	ENST00000379350	2
ENSG00000112237	CCNC	ENST00000326298	2
ENSG00000112592	TBP	ENST00000392092	2
ENSG00000112659	CUL9	ENST00000513904	2
ENSG00000112893	MAN2A1	ENST00000261483	2
ENSG00000113194	FAF2	ENST00000261942	2
ENSG00000113328	CCNG1	ENST00000512532	2
ENSG00000113407	TARS	ENST00000455217	2
ENSG00000113492	AGXT2	ENST00000512135	2
ENSG00000113520	IL4	ENST00000231449	2
ENSG00000113712	CSNK1A1	ENST00000412431	2
ENSG00000113810	SMC4	ENST00000488017	2
ENSG00000114054	PCCB	ENST00000474833	2
ENSG00000114126	TFDP2	ENST00000493204	2
ENSG00000114416	FXR1	ENST00000481383	2
ENSG00000114439	BBX	ENST00000325805	2
ENSG00000114790	ARHGEF26	ENST00000483068	2
ENSG00000114857	NKTR	ENST00000490189	2
ENSG00000114861	FOXP1	ENST00000497355	2
ENSG00000115091	ACTR3	ENST00000489779	2
ENSG00000115295	CLIP4	ENST00000404424	2
ENSG00000115464	USP34	ENST00000398571	2
ENSG00000115548	KDM3A	ENST00000483866	2
ENSG00000115561	CHMP3	ENST00000409810	2
ENSG00000115648	MLPH	ENST00000422695	2
ENSG00000115738	ID2	ENST00000234091	2
ENSG00000115827	DCAF17	ENST00000490217	2
ENSG00000115850	LCT	ENST00000452974	2
ENSG00000115966	ATF2	ENST00000264110	2
ENSG00000115998	C2orf42	ENST00000470096	2
ENSG00000116001	TIA1	ENST00000282574	2
ENSG00000116095	PLEKHA3	ENST00000461474	2
ENSG00000116138	DNAJC16	ENST00000483270	2
ENSG00000116350	SRSF4	ENST00000373795	2
ENSG00000116641	DOCK7	ENST00000634652	2
ENSG00000116652	DLEU2L	ENST00000371086	2
ENSG00000116688	MFN2	ENST00000412236	2
ENSG00000116698	SMG7	ENST00000347615	2
ENSG00000116793	PHTF1	ENST00000369598	2
ENSG00000116833	NR5A2	ENST00000447034	2
ENSG00000116903	EXOC8	ENST00000366645	2
ENSG00000116954	RRAGC	ENST00000373001	2
ENSG00000117054	ACADM	ENST00000529059	2
ENSG00000117114	ADGRL2	ENST00000359929	2
ENSG00000117450	PRDX1	ENST00000262746	2
ENSG00000117472	TSPAN1	ENST00000464786	2
ENSG00000117528	ABCD3	ENST00000484213	2
ENSG00000117620	SLC35A3	ENST00000532693	2
ENSG00000117713	ARID1A	ENST00000615191	2
ENSG00000117862	TXNDC12	ENST00000472624	2
ENSG00000118058	KMT2A	ENST00000389506	2
ENSG00000118096	IFT46	ENST00000264020	2
ENSG00000118271	TTR	ENST00000237014	2
ENSG00000118564	FBXL5	ENST00000507899	2
ENSG00000118939	UCHL3	ENST00000377595	2
ENSG00000119231	SENP5	ENST00000323460	2
ENSG00000119280	C1orf198	ENST00000470540	2
ENSG00000119421	NDUFA8	ENST00000373768	2
ENSG00000119574	ZBTB45	ENST00000354590	2
ENSG00000119650	IFT43	ENST00000238628	2
ENSG00000119685	TTLL5	ENST00000554935	2
ENSG00000119703	ZC2HC1C	ENST00000524913	2
ENSG00000119777	TMEM214	ENST00000238788	2
ENSG00000119953	SMNDC1	ENST00000369603	2
ENSG00000120341	SEC16B	ENST00000528461	2
ENSG00000120438	TCP1	ENST00000546204	2
ENSG00000120451	SNX19	ENST00000265909	2
ENSG00000120549	KIAA1217	ENST00000460373	2
ENSG00000120616	EPC1	ENST00000462470	2
ENSG00000120694	HSPH1	ENST00000445273	2
ENSG00000120784	ZFP30	ENST00000351218	2
ENSG00000120907	ADRA1A	ENST00000380573	2
ENSG00000120963	ZNF706	ENST00000519882	2
ENSG00000121210	KIAA0922	ENST00000240487	2
ENSG00000121211	MND1	ENST00000508731	2
ENSG00000121318	TAS2R10	ENST00000240619	2
ENSG00000121895	TMEM156	ENST00000344606	2
ENSG00000122417	ODF2L	ENST00000460698	2
ENSG00000122420	PTGFR	ENST00000370758	2
ENSG00000122482	ZNF644	ENST00000482709	2
ENSG00000122696	SLC25A51	ENST00000242275	2
ENSG00000122786	CALD1	ENST00000361675	2
ENSG00000123094	RASSF8	ENST00000611440	2
ENSG00000123213	NLN	ENST00000507201	2
ENSG00000123352	SPATS2	ENST00000548727	2
ENSG00000123472	ATPAF1	ENST00000525633	2
ENSG00000123600	METTL8	ENST00000442778	2
ENSG00000123836	PFKFB2	ENST00000367079	2
ENSG00000124383	MPHOSPH10	ENST00000244230	2
ENSG00000124406	ATP8A1	ENST00000506713	2
ENSG00000124587	PEX6	ENST00000244546	2
ENSG00000125257	ABCC4	ENST00000484109	2
ENSG00000125375	ATP5S	ENST00000553774	2
ENSG00000125691	RPL23	ENST00000245857	2
ENSG00000125703	ATG4C	ENST00000371118	2
ENSG00000125875	TBC1D20	ENST00000354200	2
ENSG00000126261	UBA2	ENST00000592791	2
ENSG00000126749	EMG1	ENST00000539196	2
ENSG00000126777	KTN1	ENST00000395309	2
ENSG00000126821	SGPP1	ENST00000247225	2
ENSG00000126861	OMG	ENST00000584094	2
ENSG00000127022	CANX	ENST00000503126	2
ENSG00000127184	COX7C	ENST00000247655	2
ENSG00000127603	MACF1	ENST00000372925	2
ENSG00000127720	METTL25	ENST00000550058	2
ENSG00000128283	CDC42EP1	ENST00000415670	2
ENSG00000128294	TPST2	ENST00000398110	2
ENSG00000128607	KLHDC10	ENST00000335420	2
ENSG00000128805	ARHGAP22	ENST00000249601	2
ENSG00000128915	ICE2	ENST00000261520	2
ENSG00000129084	PSMA1	ENST00000528307	2
ENSG00000129351	ILF3	ENST00000587941	2
ENSG00000129696	TTI2	ENST00000360742	2
ENSG00000130164	LDLR	ENST00000558518	2
ENSG00000130413	STK33	ENST00000457885	2
ENSG00000130731	C16orf13	ENST00000338401	2
ENSG00000130803	ZNF317	ENST00000247956	2
ENSG00000131051	RBM39	ENST00000253363	2
ENSG00000131778	CHD1L	ENST00000469625	2
ENSG00000131931	THAP1	ENST00000254250	2
ENSG00000132141	CCT6B	ENST00000577307	2
ENSG00000132199	ENOSF1	ENST00000584259	2
ENSG00000132305	IMMT	ENST00000419070	2
ENSG00000132434	LANCL2	ENST00000254770	2
ENSG00000132475	H3F3B	ENST00000591893	2
ENSG00000132669	RIN2	ENST00000255006	2
ENSG00000132773	TOE1	ENST00000477731	2
ENSG00000132792	CTNNBL1	ENST00000361383	2
ENSG00000132849	PATJ	ENST00000316485	2
ENSG00000133083	DCLK1	ENST00000379893	2
ENSG00000133112	TPT1	ENST00000484604	2
ENSG00000133706	LARS	ENST00000274562	2
ENSG00000133710	SPINK5	ENST00000521206	2
ENSG00000133740	E2F5	ENST00000520225	2
ENSG00000133773	CCDC59	ENST00000552377	2
ENSG00000133835	HSD17B4	ENST00000520244	2
ENSG00000133858	ZFC3H1	ENST00000378743	2
ENSG00000133943	C14orf159	ENST00000522837	2
ENSG00000134014	ELP3	ENST00000520110	2
ENSG00000134046	MBD2	ENST00000578272	2
ENSG00000134049	IER3IP1	ENST00000256433	2
ENSG00000134056	MRPS36	ENST00000256441	2
ENSG00000134061	CD180	ENST00000515027	2
ENSG00000134318	ROCK2	ENST00000460262	2
ENSG00000134321	RSAD2	ENST00000382040	2
ENSG00000134333	LDHA	ENST00000227157	2
ENSG00000134352	IL6ST	ENST00000381298	2
ENSG00000134371	CDC73	ENST00000482484	2
ENSG00000134419	RPS15A	ENST00000322989	2
ENSG00000134444	KIAA1468	ENST00000592479	2
ENSG00000134769	DTNA	ENST00000598142	2
ENSG00000134827	TCN1	ENST00000529251	2
ENSG00000134910	STT3A	ENST00000392708	2
ENSG00000134986	NREP	ENST00000395634	2
ENSG00000135040	NAA35	ENST00000376040	2
ENSG00000135069	PSAT1	ENST00000347159	2
ENSG00000135373	EHF	ENST00000527935	2
ENSG00000135486	HNRNPA1	ENST00000551665	2
ENSG00000135506	OS9	ENST00000257966	2
ENSG00000135677	GNS	ENST00000541781	2
ENSG00000135749	PCNX2	ENST00000522067	2
ENSG00000135775	COG2	ENST00000534989	2
ENSG00000135778	NTPCR	ENST00000366628	2
ENSG00000135829	DHX9	ENST00000367549	2
ENSG00000135945	REV1	ENST00000258428	2
ENSG00000135999	EPC2	ENST00000491099	2
ENSG00000136051	KIAA1033	ENST00000552203	2
ENSG00000136111	TBC1D4	ENST00000493487	2
ENSG00000136231	IGF2BP3	ENST00000258729	2
ENSG00000136436	CALCOCO2	ENST00000502761	2
ENSG00000136450	SRSF1	ENST00000258962	2
ENSG00000136560	TANK	ENST00000402568	2
ENSG00000136628	EPRS	ENST00000464052	2
ENSG00000136636	KCTD3	ENST00000259154	2
ENSG00000136810	TXN	ENST00000487892	2
ENSG00000136874	STX17	ENST00000529385	2
ENSG00000136938	ANP32B	ENST00000486769	2
ENSG00000137055	PLAA	ENST00000517642	2
ENSG00000137200	CMTR1	ENST00000475364	2
ENSG00000137269	LRRC1	ENST00000370888	2
ENSG00000137337	MDC1	ENST00000425072	2
ENSG00000137504	CREBZF	ENST00000490820	2
ENSG00000137693	YAP1	ENST00000524575	2
ENSG00000137710	RDX	ENST00000530085	2
ENSG00000137766	UNC13C	ENST00000539562	2
ENSG00000137819	PAQR5	ENST00000340965	2
ENSG00000137845	ADAM10	ENST00000475898	2
ENSG00000137955	RABGGTB	ENST00000467748	2
ENSG00000137976	DNASE2B	ENST00000370662	2
ENSG00000138119	MYOF	ENST00000358334	2
ENSG00000138162	TACC2	ENST00000474014	2
ENSG00000138363	ATIC	ENST00000427397	2
ENSG00000138376	BARD1	ENST00000465841	2
ENSG00000138413	IDH1	ENST00000484575	2
ENSG00000138495	COX17	ENST00000497997	2
ENSG00000138641	HERC3	ENST00000513325	2
ENSG00000138646	HERC5	ENST00000264350	2
ENSG00000138663	COPS4	ENST00000264389	2
ENSG00000138768	USO1	ENST00000264904	2
ENSG00000138771	SHROOM3	ENST00000296043	2
ENSG00000138835	RGS3	ENST00000470775	2
ENSG00000139131	YARS2	ENST00000324868	2
ENSG00000139324	TMTC3	ENST00000266712	2
ENSG00000139734	DIAPH3	ENST00000470420	2
ENSG00000139746	RBM26	ENST00000438724	2
ENSG00000139921	TMX1	ENST00000457354	2
ENSG00000140025	EFCAB11	ENST00000550103	2
ENSG00000140262	TCF12	ENST00000560887	2
ENSG00000140299	BNIP2	ENST00000478981	2
ENSG00000140365	COMMD4	ENST00000267935	2
ENSG00000140459	CYP11A1	ENST00000566674	2
ENSG00000140543	DET1	ENST00000268148	2
ENSG00000140545	MFGE8	ENST00000560553	2
ENSG00000140836	ZFHX3	ENST00000558842	2
ENSG00000140859	KIFC3	ENST00000623271	2
ENSG00000140943	MBTPS1	ENST00000343411	2
ENSG00000140950	TLDC1	ENST00000567321	2
ENSG00000141030	COPS3	ENST00000268717	2
ENSG00000141101	NOB1	ENST00000268802	2
ENSG00000141279	NPEPPS	ENST00000534727	2
ENSG00000141404	GNAL	ENST00000590228	2
ENSG00000141556	TBCD	ENST00000572984	2
ENSG00000141682	PMAIP1	ENST00000269518	2
ENSG00000141837	CACNA1A	ENST00000574974	2
ENSG00000142002	DPP9	ENST00000598041	2
ENSG00000142166	IFNAR1	ENST00000493503	2
ENSG00000142188	TMEM50B	ENST00000484377	2
ENSG00000142546	NOSIP	ENST00000339093	2
ENSG00000143013	LMO4	ENST00000370542	2
ENSG00000143156	NME7	ENST00000469474	2
ENSG00000143198	MGST3	ENST00000367889	2
ENSG00000143303	RRNAD1	ENST00000368216	2
ENSG00000143442	POGZ	ENST00000392723	2
ENSG00000143476	DTL	ENST00000475419	2
ENSG00000143486	EIF2D	ENST00000271764	2
ENSG00000143543	JTB	ENST00000428469	2
ENSG00000143624	INTS3	ENST00000476843	2
ENSG00000143951	WDPCP	ENST00000418148	2
ENSG00000143995	MEIS1	ENST00000272369	2
ENSG00000144228	SPOPL	ENST00000467775	2
ENSG00000144331	ZNF385B	ENST00000409343	2
ENSG00000144476	ACKR3	ENST00000272928	2
ENSG00000144481	TRPM8	ENST00000487033	2
ENSG00000144619	CNTN4	ENST00000473058	2
ENSG00000144677	CTDSPL	ENST00000447745	2
ENSG00000144746	ARL6IP5	ENST00000273258	2
ENSG00000144827	ABHD10	ENST00000273359	2
ENSG00000144848	ATG3	ENST00000492886	2
ENSG00000145012	LPP	ENST00000457242	2
ENSG00000145041	DCAF1	ENST00000423656	2
ENSG00000145147	SLIT2	ENST00000508541	2
ENSG00000145191	EIF2B5	ENST00000432569	2
ENSG00000145332	KLHL8	ENST00000506274	2
ENSG00000145569	FAM105A	ENST00000274217	2
ENSG00000145675	PIK3R1	ENST00000320694	2
ENSG00000145782	ATG12	ENST00000505252	2
ENSG00000145819	ARHGAP26	ENST00000475287	2
ENSG00000145835	CDKN2AIPNLP2	ENST00000274516	2
ENSG00000145868	FBXO38	ENST00000504447	2
ENSG00000146416	AIG1	ENST00000367601	2
ENSG00000146648	EGFR	ENST00000450046	2
ENSG00000146666	LINC00525	ENST00000412730	2
ENSG00000146776	ATXN7L1	ENST00000472195	2
ENSG00000146963	LUC7L2	ENST00000354926	2
ENSG00000147649	MTDH	ENST00000522104	2
ENSG00000147654	EBAG9	ENST00000530629	2
ENSG00000148297	MED22	ENST00000343730	2
ENSG00000148303	RPL7A	ENST00000323345	2
ENSG00000148498	PARD3	ENST00000544292	2
ENSG00000149054	ZNF215	ENST00000278319	2
ENSG00000149182	ARFGAP2	ENST00000426335	2
ENSG00000149311	ATM	ENST00000526567	2
ENSG00000149541	B3GAT3	ENST00000532585	2
ENSG00000150593	PDCD4	ENST00000462577	2
ENSG00000150764	DIXDC1	ENST00000526418	2
ENSG00000150991	UBC	ENST00000540700	2
ENSG00000151247	EIF4E	ENST00000280892	2
ENSG00000151304	SRFBP1	ENST00000339397	2
ENSG00000151491	EPS8	ENST00000508018	2
ENSG00000151690	MFSD6	ENST00000412482	2
ENSG00000151729	SLC25A4	ENST00000281456	2
ENSG00000151748	SAV1	ENST00000324679	2
ENSG00000151967	SCHIP1	ENST00000475932	2
ENSG00000152256	PDK1	ENST00000282077	2
ENSG00000152464	RPP38	ENST00000378197	2
ENSG00000152601	MBNL1	ENST00000463374	2
ENSG00000152931	PART1	ENST00000504876	2
ENSG00000153071	DAB2	ENST00000512525	2
ENSG00000153113	CAST	ENST00000505143	2
ENSG00000153347	FAM81B	ENST00000513110	2
ENSG00000153558	FBXL2	ENST00000460186	2
ENSG00000153802	TMPRSS11D	ENST00000502573	2
ENSG00000153933	DGKE	ENST00000284061	2
ENSG00000153982	GDPD1	ENST00000579076	2
ENSG00000154175	ABI3BP	ENST00000497021	2
ENSG00000154269	ENPP3	ENST00000494023	2
ENSG00000154305	MIA3	ENST00000467190	2
ENSG00000155096	AZIN1	ENST00000347770	2
ENSG00000155508	CNOT8	ENST00000285896	2
ENSG00000155666	KDM8	ENST00000441782	2
ENSG00000156042	CFAP70	ENST00000310715	2
ENSG00000156265	MAP3K7CL	ENST00000470800	2
ENSG00000156284	CLDN8	ENST00000399899	2
ENSG00000156970	BUB1B	ENST00000558151	2
ENSG00000157131	C8A	ENST00000361249	2
ENSG00000157184	CPT2	ENST00000371486	2
ENSG00000157349	DDX19B	ENST00000288071	2
ENSG00000157483	MYO1E	ENST00000560642	2
ENSG00000157625	TAB3	ENST00000288422	2
ENSG00000157796	WDR19	ENST00000507228	2
ENSG00000158161	EYA3	ENST00000373864	2
ENSG00000158169	FANCC	ENST00000433644	2
ENSG00000158321	AUTS2	ENST00000611706	2
ENSG00000158467	AHCYL2	ENST00000460109	2
ENSG00000158710	TAGLN2	ENST00000397334	2
ENSG00000158716	DUSP23	ENST00000368109	2
ENSG00000158796	DEDD	ENST00000368006	2
ENSG00000158813	EDA	ENST00000503592	2
ENSG00000158987	RAPGEF6	ENST00000512052	2
ENSG00000159063	ALG8	ENST00000526849	2
ENSG00000159398	CES5A	ENST00000290567	2
ENSG00000159445	THEM4	ENST00000368814	2
ENSG00000160145	KALRN	ENST00000448253	2
ENSG00000161800	RACGAP1	ENST00000551876	2
ENSG00000161920	MED11	ENST00000293777	2
ENSG00000162419	GMEB1	ENST00000294409	2
ENSG00000162599	NFIA	ENST00000403491	2
ENSG00000162614	NEXN	ENST00000464998	2
ENSG00000162636	FAM102B	ENST00000483371	2
ENSG00000162641	AKNAD1	ENST00000603450	2
ENSG00000162670	BRINP3	ENST00000633243	2
ENSG00000162695	SLC30A7	ENST00000370112	2
ENSG00000162769	FLVCR1	ENST00000366971	2
ENSG00000162772	ATF3	ENST00000341491	2
ENSG00000162782	TDRD5	ENST00000417329	2
ENSG00000162813	BPNT1	ENST00000354807	2
ENSG00000162814	SPATA17	ENST00000366933	2
ENSG00000162959	MEMO1	ENST00000379383	2
ENSG00000163041	H3F3A	ENST00000366816	2
ENSG00000163116	STPG2	ENST00000295268	2
ENSG00000163206	SMCP	ENST00000368765	2
ENSG00000163320	CGGBP1	ENST00000462901	2
ENSG00000163380	LMOD3	ENST00000420581	2
ENSG00000163406	SLC15A2	ENST00000489711	2
ENSG00000163466	ARPC2	ENST00000456575	2
ENSG00000163491	NEK10	ENST00000341435	2
ENSG00000163545	NUAK2	ENST00000367157	2
ENSG00000163576	EFHB	ENST00000467602	2
ENSG00000163607	GTPBP8	ENST00000473129	2
ENSG00000163618	CADPS	ENST00000613879	2
ENSG00000163626	COX18	ENST00000507544	2
ENSG00000163644	PPM1K	ENST00000295908	2
ENSG00000163689	C3orf67	ENST00000478363	2
ENSG00000163694	RBM47	ENST00000511598	2
ENSG00000163705	FANCD2OS	ENST00000450616	2
ENSG00000163734	CXCL3	ENST00000296026	2
ENSG00000163749	CCDC158	ENST00000388914	2
ENSG00000163788	SNRK	ENST00000468628	2
ENSG00000163874	ZC3H12A	ENST00000373087	2
ENSG00000163959	SLC51A	ENST00000296327	2
ENSG00000164037	SLC9B1	ENST00000503584	2
ENSG00000164105	SAP30	ENST00000504618	2
ENSG00000164111	ANXA5	ENST00000509648	2
ENSG00000164114	MAP9	ENST00000311277	2
ENSG00000164163	ABCE1	ENST00000510321	2
ENSG00000164220	F2RL2	ENST00000296641	2
ENSG00000164284	GRPEL2	ENST00000416916	2
ENSG00000164308	ERAP2	ENST00000512869	2
ENSG00000164327	RICTOR	ENST00000296782	2
ENSG00000164329	PAPD4	ENST00000515298	2
ENSG00000164344	KLKB1	ENST00000446598	2
ENSG00000164465	DCBLD1	ENST00000481630	2
ENSG00000164509	IL31RA	ENST00000359040	2
ENSG00000164744	SUN3	ENST00000461953	2
ENSG00000164853	UNCX	ENST00000316333	2
ENSG00000164898	C7orf55	ENST00000297534	2
ENSG00000164924	YWHAZ	ENST00000523848	2
ENSG00000164941	INTS8	ENST00000521860	2
ENSG00000164961	KIAA0196	ENST00000517845	2
ENSG00000165023	DIRAS2	ENST00000375765	2
ENSG00000165282	PIGO	ENST00000298004	2
ENSG00000165572	KBTBD6	ENST00000379485	2
ENSG00000165632	TAF3	ENST00000344293	2
ENSG00000165799	RNASE7	ENST00000298690	2
ENSG00000165895	ARHGAP42	ENST00000524649	2
ENSG00000165914	TTC7B	ENST00000555005	2
ENSG00000165934	CPSF2	ENST00000555244	2
ENSG00000165995	CACNB2	ENST00000377315	2
ENSG00000166225	FRS2	ENST00000547414	2
ENSG00000166268	MYRFL	ENST00000547771	2
ENSG00000166326	TRIM44	ENST00000532066	2
ENSG00000166387	PPFIBP2	ENST00000530181	2
ENSG00000166398	KIAA0355	ENST00000299505	2
ENSG00000166454	ATMIN	ENST00000299575	2
ENSG00000166484	MAPK7	ENST00000572716	2
ENSG00000166689	PLEKHA7	ENST00000332954	2
ENSG00000166788	SAAL1	ENST00000531216	2
ENSG00000166801	FAM111A	ENST00000420244	2
ENSG00000167232	ZNF91	ENST00000597458	2
ENSG00000167325	RRM1	ENST00000526304	2
ENSG00000167528	ZNF641	ENST00000301042	2
ENSG00000167767	KRT80	ENST00000313234	2
ENSG00000167881	SRP68	ENST00000542536	2
ENSG00000167977	KCTD5	ENST00000301738	2
ENSG00000168137	SETD5	ENST00000468208	2
ENSG00000168159	RNF187	ENST00000305943	2
ENSG00000168214	RBPJ	ENST00000506903	2
ENSG00000168228	ZCCHC4	ENST00000505412	2
ENSG00000168283	BMI1	ENST00000442508	2
ENSG00000168298	HIST1H1E	ENST00000304218	2
ENSG00000168310	IRF2	ENST00000506230	2
ENSG00000168615	ADAM9	ENST00000484143	2
ENSG00000168710	AHCYL1	ENST00000359172	2
ENSG00000168904	LRRC28	ENST00000558771	2
ENSG00000169180	XPO6	ENST00000304658	2
ENSG00000169228	RAB24	ENST00000303251	2
ENSG00000169242	EFNA1	ENST00000368407	2
ENSG00000169252	ADRB2	ENST00000305988	2
ENSG00000169282	KCNAB1	ENST00000471742	2
ENSG00000169288	MRPL1	ENST00000502384	2
ENSG00000169372	CRADD	ENST00000550030	2
ENSG00000169696	ASPSCR1	ENST00000584454	2
ENSG00000169752	NRG4	ENST00000563582	2
ENSG00000169908	TM4SF1	ENST00000472441	2
ENSG00000170242	USP47	ENST00000525367	2
ENSG00000170365	SMAD1	ENST00000510948	2
ENSG00000170370	EMX2	ENST00000546446	2
ENSG00000170515	PA2G4	ENST00000303305	2
ENSG00000170581	STAT2	ENST00000314128	2
ENSG00000170653	ATF7	ENST00000420353	2
ENSG00000170836	PPM1D	ENST00000590418	2
ENSG00000170909	OSCAR	ENST00000351806	2
ENSG00000171435	KSR2	ENST00000339824	2
ENSG00000171566	PLRG1	ENST00000503251	2
ENSG00000171681	ATF7IP	ENST00000542991	2
ENSG00000171722	C1orf111	ENST00000367935	2
ENSG00000171988	JMJD1C	ENST00000467356	2
ENSG00000172113	NME6	ENST00000451657	2
ENSG00000172159	FRMD3	ENST00000465485	2
ENSG00000172366	MCRIP2	ENST00000619377	2
ENSG00000172466	ZNF24	ENST00000590140	2
ENSG00000172765	TMCC1	ENST00000510323	2
ENSG00000172766	NAA16	ENST00000483215	2
ENSG00000172867	KRT2	ENST00000547106	2
ENSG00000173163	COMMD1	ENST00000311832	2
ENSG00000173334	TRIB1	ENST00000311922	2
ENSG00000174106	LEMD3	ENST00000308330	2
ENSG00000174365	SNHG11	ENST00000444816	2
ENSG00000174469	CNTNAP2	ENST00000636277	2
ENSG00000174574	AKIRIN1	ENST00000372984	2
ENSG00000174611	KY	ENST00000508041	2
ENSG00000174898	CATSPERD	ENST00000381624	2
ENSG00000174970	OR10AG1	ENST00000312345	2
ENSG00000175054	ATR	ENST00000515863	2
ENSG00000175061	LRRC75A-AS1	ENST00000460249	2
ENSG00000175279	APITD1	ENST00000477755	2
ENSG00000175354	PTPN2	ENST00000589086	2
ENSG00000175395	ZNF25	ENST00000302609	2
ENSG00000175564	UCP3	ENST00000314032	2
ENSG00000175611	LINC00476	ENST00000429781	2
ENSG00000175768	TOMM5	ENST00000401811	2
ENSG00000175857	GAPT	ENST00000511178	2
ENSG00000176018	LYSMD3	ENST00000315948	2
ENSG00000176124	DLEU1	ENST00000378180	2
ENSG00000176208	ATAD5	ENST00000321990	2
ENSG00000176236	C10orf111	ENST00000624760	2
ENSG00000176720	BOK	ENST00000318407	2
ENSG00000176731	C8orf59	ENST00000321777	2
ENSG00000177119	ANO6	ENST00000441606	2
ENSG00000177200	CHD9	ENST00000564582	2
ENSG00000177239	MAN1B1	ENST00000474902	2
ENSG00000177425	PAWR	ENST00000547699	2
ENSG00000177485	ZBTB33	ENST00000326624	2
ENSG00000177551	NHLH2	ENST00000320238	2
ENSG00000177565	TBL1XR1	ENST00000631253	2
ENSG00000177613	CSTF2T	ENST00000331173	2
ENSG00000177885	GRB2	ENST00000316615	2
ENSG00000177954	RPS27	ENST00000368567	2
ENSG00000177971	IMP3	ENST00000403490	2
ENSG00000178202	KDELC2	ENST00000530529	2
ENSG00000178691	SUZ12	ENST00000494429	2
ENSG00000178694	NSUN3	ENST00000461625	2
ENSG00000178700	DHFRL1	ENST00000461173	2
ENSG00000178974	FBXO34	ENST00000313833	2
ENSG00000179195	ZNF664	ENST00000537532	2
ENSG00000179362	HMGN2P46	ENST00000313559	2
ENSG00000179526	SHARPIN	ENST00000531375	2
ENSG00000179841	AKAP5	ENST00000320636	2
ENSG00000179922	ZNF784	ENST00000591479	2
ENSG00000179933	C14orf119	ENST00000554203	2
ENSG00000180481	GLIPR1L2	ENST00000320460	2
ENSG00000180667	YOD1	ENST00000315927	2
ENSG00000181090	EHMT1	ENST00000637655	2
ENSG00000181264	TMEM136	ENST00000314475	2
ENSG00000181798	LINC00471	ENST00000313064	2
ENSG00000181826	RELL1	ENST00000314117	2
ENSG00000182150	ERCC6L2	ENST00000466840	2
ENSG00000182230	FAM153B	ENST00000509747	2
ENSG00000182628	SKA2	ENST00000581068	2
ENSG00000182648	LINC01006	ENST00000425712	2
ENSG00000182732	RGS6	ENST00000554734	2
ENSG00000182923	CEP63	ENST00000504929	2
ENSG00000183117	CSMD1	ENST00000520451	2
ENSG00000183258	DDX41	ENST00000503078	2
ENSG00000183624	HMCES	ENST00000383463	2
ENSG00000183929	DUSP5P1	ENST00000441325	2
ENSG00000184144	CNTN2	ENST00000532366	2
ENSG00000184304	PRKD1	ENST00000549503	2
ENSG00000184381	PLA2G6	ENST00000332509	2
ENSG00000184470	TXNRD2	ENST00000542719	2
ENSG00000184588	PDE4B	ENST00000480109	2
ENSG00000185296	CTD-2139B15.1	ENST00000505520	2
ENSG00000185442	FAM174B	ENST00000554082	2
ENSG00000185614	FAM212A	ENST00000333323	2
ENSG00000185722	ANKFY1	ENST00000341657	2
ENSG00000185842	DNAH14	ENST00000366849	2
ENSG00000185946	RNPC3	ENST00000532117	2
ENSG00000186074	CD300LF	ENST00000343125	2
ENSG00000186298	PPP1CC	ENST00000546904	2
ENSG00000186470	BTN3A2	ENST00000356386	2
ENSG00000186676	EEF1GP1	ENST00000457231	2
ENSG00000187098	MITF	ENST00000433517	2
ENSG00000187140	FOXD3	ENST00000371116	2
ENSG00000187189	TSPYL4	ENST00000420283	2
ENSG00000187446	CHP1	ENST00000560965	2
ENSG00000187699	C2orf88	ENST00000450357	2
ENSG00000187758	ADH1A	ENST00000209668	2
ENSG00000187866	FAM122A	ENST00000394264	2
ENSG00000188001	TPRG1	ENST00000488841	2
ENSG00000188107	EYS	ENST00000486069	2
ENSG00000188554	NBR1	ENST00000341165	2
ENSG00000188581	KRTAP1-1	ENST00000306271	2
ENSG00000188596	CFAP54	ENST00000637336	2
ENSG00000188761	BCL2L15	ENST00000393316	2
ENSG00000188895	MSL1	ENST00000398532	2
ENSG00000188958	UTS2B	ENST00000425357	2
ENSG00000189042	ZNF567	ENST00000536254	2
ENSG00000189091	SF3B3	ENST00000572365	2
ENSG00000189157	FAM47E	ENST00000515589	2
ENSG00000189241	TSPYL1	ENST00000368608	2
ENSG00000189343	RPS2P46	ENST00000458332	2
ENSG00000196132	MYT1	ENST00000328439	2
ENSG00000196171	OR6K2	ENST00000359610	2
ENSG00000196182	STK40	ENST00000373129	2
ENSG00000196247	ZNF107	ENST00000344930	2
ENSG00000196267	ZNF836	ENST00000597252	2
ENSG00000196284	SUPT3H	ENST00000475057	2
ENSG00000196305	IARS	ENST00000498025	2
ENSG00000196365	LONP1	ENST00000360614	2
ENSG00000196428	TSC22D2	ENST00000492828	2
ENSG00000196531	NACA	ENST00000393891	2
ENSG00000196639	HRH1	ENST00000413416	2
ENSG00000196730	DAPK1	ENST00000463069	2
ENSG00000196747	HIST1H2AI	ENST00000358739	2
ENSG00000196792	STRN3	ENST00000555358	2
ENSG00000197024	ZNF398	ENST00000485111	2
ENSG00000197050	ZNF420	ENST00000304239	2
ENSG00000197099	RP11-573D15.8	ENST00000599314	2
ENSG00000197140	ADAM32	ENST00000520691	2
ENSG00000197168	NEK5	ENST00000465811	2
ENSG00000197181	PIWIL2	ENST00000519884	2
ENSG00000197312	DDI2	ENST00000480945	2
ENSG00000197320	AC060834.2	ENST00000443027	2
ENSG00000197323	TRIM33	ENST00000358465	2
ENSG00000197555	SIPA1L1	ENST00000553453	2
ENSG00000197563	PIGN	ENST00000585344	2
ENSG00000197658	SLC22A24	ENST00000326192	2
ENSG00000197965	MPZL1	ENST00000367853	2
ENSG00000197971	MBP	ENST00000581878	2
ENSG00000198089	SFI1	ENST00000465646	2
ENSG00000198092	TMPRSS11F	ENST00000356291	2
ENSG00000198168	SVIP	ENST00000533774	2
ENSG00000198363	ASPH	ENST00000389204	2
ENSG00000198369	SPRED2	ENST00000443619	2
ENSG00000198382	UVRAG	ENST00000528420	2
ENSG00000198431	TXNRD1	ENST00000526266	2
ENSG00000198440	ZNF583	ENST00000291598	2
ENSG00000198513	ATL1	ENST00000553746	2
ENSG00000198610	AKR1C4	ENST00000263126	2
ENSG00000198646	NCOA6	ENST00000359003	2
ENSG00000198663	C6orf89	ENST00000355190	2
ENSG00000198689	SLC9A6	ENST00000370695	2
ENSG00000198743	SLC5A3	ENST00000381151	2
ENSG00000198836	OPA1	ENST00000483516	2
ENSG00000198862	LTN1	ENST00000483326	2
ENSG00000198894	CIPC	ENST00000361786	2
ENSG00000198931	APRT	ENST00000378364	2
ENSG00000199260	RNU6-874P	ENST00000362390	2
ENSG00000199409	Y_RNA	ENST00000362539	2
ENSG00000199466	Y_RNA	ENST00000362596	2
ENSG00000199592	RNA5SP321	ENST00000362722	2
ENSG00000199797	Y_RNA	ENST00000362927	2
ENSG00000199962	Y_RNA	ENST00000363092	2
ENSG00000199979	Y_RNA	ENST00000363109	2
ENSG00000199990	VTRNA1-1	ENST00000363120	2
ENSG00000200079	RNA5SP326	ENST00000363209	2
ENSG00000200138	RNY1P10	ENST00000363268	2
ENSG00000200473	RNA5SP507	ENST00000363603	2
ENSG00000200521	Y_RNA	ENST00000363651	2
ENSG00000200579	Y_RNA	ENST00000363709	2
ENSG00000200608	SNORD114-11	ENST00000363738	2
ENSG00000200888	Y_RNA	ENST00000364018	2
ENSG00000200959	SNORA74A	ENST00000364089	2
ENSG00000201157	SNORA62	ENST00000364287	2
ENSG00000201457	SNORA55	ENST00000364587	2
ENSG00000201600	RN7SKP124	ENST00000364730	2
ENSG00000201608	RNU4-42P	ENST00000364738	2
ENSG00000201689	SNORD114-29	ENST00000364819	2
ENSG00000201899	SNORD114-24	ENST00000365029	2
ENSG00000202044	RNA5SP223	ENST00000365174	2
ENSG00000202103	RNU4-12P	ENST00000365233	2
ENSG00000202318	Y_RNA	ENST00000365448	2
ENSG00000202402	Y_RNA	ENST00000365532	2
ENSG00000202417	Y_RNA	ENST00000365547	2
ENSG00000202538	RNU4-2	ENST00000365668	2
ENSG00000203791	METTL10	ENST00000468738	2
ENSG00000203857	HSD3B1	ENST00000369413	2
ENSG00000204634	TBC1D8	ENST00000376840	2
ENSG00000204683	C10orf113	ENST00000529198	2
ENSG00000204684	RP5-1004I9.1	ENST00000634280	2
ENSG00000204842	ATXN2	ENST00000471866	2
ENSG00000204856	FAM216A	ENST00000548449	2
ENSG00000204954	C12orf73	ENST00000378090	2
ENSG00000205279	CTXN3	ENST00000379445	2
ENSG00000205333	GOLGA2P1	ENST00000512938	2
ENSG00000205413	SAMD9	ENST00000379958	2
ENSG00000206249	CTD-2308N23.2	ENST00000437016	2
ENSG00000206560	ANKRD28	ENST00000497037	2
ENSG00000206604	RNU6-425P	ENST00000383877	2
ENSG00000206659	Y_RNA	ENST00000383932	2
ENSG00000206800	RNY3P7	ENST00000384073	2
ENSG00000206814	Y_RNA	ENST00000384087	2
ENSG00000206973	RNU6-1145P	ENST00000384246	2
ENSG00000206998	Y_RNA	ENST00000384271	2
ENSG00000207067	SNORA72	ENST00000384339	2
ENSG00000207157	RNY3P4	ENST00000384428	2
ENSG00000207282	Y_RNA	ENST00000384552	2
ENSG00000207286	Y_RNA	ENST00000384556	2
ENSG00000207326	Y_RNA	ENST00000384596	2
ENSG00000207416	Y_RNA	ENST00000384685	2
ENSG00000207466	Y_RNA	ENST00000384735	2
ENSG00000207480	Y_RNA	ENST00000384749	2
ENSG00000207501	RNVU1-14	ENST00000384770	2
ENSG00000207559	MIR578	ENST00000384828	2
ENSG00000207578	MIR583	ENST00000384846	2
ENSG00000207698	MIR32	ENST00000384965	2
ENSG00000207780	MIR648	ENST00000385046	2
ENSG00000208022	MIR618	ENST00000385287	2
ENSG00000211514	MIR454	ENST00000390180	2
ENSG00000211821	TRDV2	ENST00000390469	2
ENSG00000211856	TRAJ33	ENST00000390504	2
ENSG00000211859	TRAJ30	ENST00000390507	2
ENSG00000212161	SNORD64	ENST00000390859	2
ENSG00000212260	RNU6-724P	ENST00000390958	2
ENSG00000212309	SNORD70	ENST00000391007	2
ENSG00000212379	RNU6-269P	ENST00000391077	2
ENSG00000212410	RNU6-932P	ENST00000391108	2
ENSG00000212510	RNU6-972P	ENST00000391208	2
ENSG00000212520	RNU6-1250P	ENST00000391218	2
ENSG00000212901	KRTAP3-1	ENST00000391588	2
ENSG00000213047	DENND1B	ENST00000463124	2
ENSG00000213185	FAM24B	ENST00000368896	2
ENSG00000213365	AP000593.6	ENST00000393668	2
ENSG00000213443	RP11-75L1.2	ENST00000396690	2
ENSG00000213561	RP11-386I14.2	ENST00000265259	2
ENSG00000213742	ZNF337-AS1	ENST00000414393	2
ENSG00000213809	KLRK1	ENST00000540818	2
ENSG00000213928	IRF9	ENST00000396864	2
ENSG00000214102	WEE2	ENST00000397541	2
ENSG00000214300	SPDYE3	ENST00000332397	2
ENSG00000215374	FAM66B	ENST00000529456	2
ENSG00000215867	KRT18P57	ENST00000443599	2
ENSG00000217195	RP11-277I20.2	ENST00000406602	2
ENSG00000218173	RP11-427E4.1	ENST00000406305	2
ENSG00000219481	NBPF1	ENST00000430580	2
ENSG00000220875	HIST1H3PS1	ENST00000404612	2
ENSG00000221817	PPP3CB-AS1	ENST00000442133	2
ENSG00000221852	KRTAP1-5	ENST00000361883	2
ENSG00000221909	FAM200A	ENST00000449309	2
ENSG00000221914	PPP2R2A	ENST00000517754	2
ENSG00000222095	SNORD113	ENST00000410163	2
ENSG00000222231	RNU2-54P	ENST00000410299	2
ENSG00000222255	RNU6-101P	ENST00000410323	2
ENSG00000222808	RNU4-47P	ENST00000410876	2
ENSG00000223254	Y_RNA	ENST00000411322	2
ENSG00000223635	RP4-613A2.1	ENST00000417605	2
ENSG00000223812	RP11-197K6.1	ENST00000439804	2
ENSG00000223997	TRDD1	ENST00000415118	2
ENSG00000224020	MIR181A2HG	ENST00000429139	2
ENSG00000224417	RP11-503C24.6	ENST00000445442	2
ENSG00000224467	AC009313.1	ENST00000425470	2
ENSG00000224687	RASAL2-AS1	ENST00000452867	2
ENSG00000224843	LINC00240	ENST00000420081	2
ENSG00000224891	AC007899.3	ENST00000412776	2
ENSG00000225102	RP11-456H18.1	ENST00000456036	2
ENSG00000225449	RAB6C-AS1	ENST00000433431	2
ENSG00000225595	LINC01623	ENST00000440244	2
ENSG00000225642	SNRPEP5	ENST00000425442	2
ENSG00000225727	RP11-71C5.2	ENST00000426579	2
ENSG00000225760	LINC00431	ENST00000440735	2
ENSG00000225830	ERCC6	ENST00000479652	2
ENSG00000225975	LINC01534	ENST00000425254	2
ENSG00000226312	CFLAR-AS1	ENST00000593896	2
ENSG00000226328	NUP50-AS1	ENST00000426282	2
ENSG00000226412	RP11-476F14.1	ENST00000457848	2
ENSG00000226605	AC007098.1	ENST00000452397	2
ENSG00000226671	AC005008.3	ENST00000456151	2
ENSG00000226676	RP11-589B3.6	ENST00000421256	2
ENSG00000227181	RP11-317P15.3	ENST00000435492	2
ENSG00000227210	AC079145.4	ENST00000416575	2
ENSG00000227217	RP11-367J7.3	ENST00000453692	2
ENSG00000227339	THRAP3P1	ENST00000411753	2
ENSG00000227509	EIF2B5-IT1	ENST00000451348	2
ENSG00000227532	AC002542.2	ENST00000440683	2
ENSG00000227542	AC092614.2	ENST00000419640	2
ENSG00000227902	AC062032.1	ENST00000436245	2
ENSG00000227954	TARID	ENST00000607573	2
ENSG00000227983	BRK1P2	ENST00000442875	2
ENSG00000228271	RP11-513G11.2	ENST00000440556	2
ENSG00000228393	LINC01004	ENST00000445184	2
ENSG00000228436	RP5-864K19.4	ENST00000456813	2
ENSG00000228451	SDAD1P1	ENST00000524156	2
ENSG00000228486	LINC01125	ENST00000445382	2
ENSG00000228509	AC006460.2	ENST00000421437	2
ENSG00000228548	ITPKB-AS1	ENST00000453525	2
ENSG00000228566	RP11-170M17.1	ENST00000444770	2
ENSG00000228607	CLDN25	ENST00000453129	2
ENSG00000228663	PSMD10P1	ENST00000436861	2
ENSG00000228686	RP11-492I21.1	ENST00000426030	2
ENSG00000228950	AC023137.2	ENST00000448241	2
ENSG00000229127	AC007038.7	ENST00000452057	2
ENSG00000229400	RP11-3L21.2	ENST00000431691	2
ENSG00000229554	RPL21P24	ENST00000413752	2
ENSG00000229616	RP11-369J21.11	ENST00000417217	2
ENSG00000229950	TFAP2A-AS1	ENST00000420777	2
ENSG00000230115	TPRG1-AS2	ENST00000425454	2
ENSG00000230163	RP5-997D16.2	ENST00000429293	2
ENSG00000230283	RPS12P24	ENST00000412619	2
ENSG00000230286	AC013472.4	ENST00000416226	2
ENSG00000230561	CCDC192	ENST00000513708	2
ENSG00000230638	RP11-486B10.4	ENST00000434240	2
ENSG00000230735	RP11-413E1.4	ENST00000429074	2
ENSG00000230798	FOXD3-AS1	ENST00000418244	2
ENSG00000231079	AC105402.4	ENST00000608822	2
ENSG00000231170	AC002451.3	ENST00000411728	2
ENSG00000231607	DLEU2	ENST00000235290	2
ENSG00000231856	RP11-327P2.5	ENST00000618844	2
ENSG00000232154	MTCYBP15	ENST00000433123	2
ENSG00000232208	RP3-477M7.5	ENST00000424862	2
ENSG00000232316	RP1-124C6.1	ENST00000430728	2
ENSG00000232524	RP11-332K15.1	ENST00000419832	2
ENSG00000232624	LINC01517	ENST00000621861	2
ENSG00000232645	LINC01431	ENST00000442440	2
ENSG00000232667	AC004862.6	ENST00000605580	2
ENSG00000232780	GAPDHP74	ENST00000449411	2
ENSG00000232792	FTH1P25	ENST00000447665	2
ENSG00000232930	AC083864.3	ENST00000446024	2
ENSG00000232959	RP11-332H17.1	ENST00000440321	2
ENSG00000233096	RP11-520A21.1	ENST00000453828	2
ENSG00000233429	HOTAIRM1	ENST00000593300	2
ENSG00000233452	STXBP5-AS1	ENST00000367477	2
ENSG00000233623	PGAM1P11	ENST00000416729	2
ENSG00000233640	KRTAP13-5P	ENST00000418755	2
ENSG00000233672	RNASEH2B-AS1	ENST00000601286	2
ENSG00000234041	RP11-345I18.1	ENST00000424885	2
ENSG00000234172	AC093639.1	ENST00000441026	2
ENSG00000234219	CDCA4P4	ENST00000435216	2
ENSG00000234327	AC012146.7	ENST00000413077	2
ENSG00000234604	RP1-206D15.5	ENST00000452472	2
ENSG00000234680	VN2R3P	ENST00000422626	2
ENSG00000234899	SOX9-AS1	ENST00000533996	2
ENSG00000234933	CDC42P1	ENST00000456658	2
ENSG00000235049	LINC00940	ENST00000418006	2
ENSG00000235092	ID2-AS1	ENST00000412712	2
ENSG00000235106	LINC00094	ENST00000432807	2
ENSG00000235142	RP1-60O19.1	ENST00000607758	2
ENSG00000235300	THRA1/BTR	ENST00000421610	2
ENSG00000235429	AC083875.2	ENST00000419509	2
ENSG00000235652	RP11-545I5.3	ENST00000626919	2
ENSG00000235717	DPP10-AS2	ENST00000446992	2
ENSG00000235794	MTND3P21	ENST00000433774	2
ENSG00000235967	COX5BP3	ENST00000454627	2
ENSG00000236013	RP3-332B22.1	ENST00000418834	2
ENSG00000236039	AC017060.1	ENST00000451792	2
ENSG00000236345	RP11-59D5__B.2	ENST00000429530	2
ENSG00000236360	RP11-334A14.2	ENST00000414168	2
ENSG00000236801	RPL24P8	ENST00000446071	2
ENSG00000236915	RP4-651E10.4	ENST00000456587	2
ENSG00000236973	GAPDHP51	ENST00000426454	2
ENSG00000236986	RP11-544A12.4	ENST00000417798	2
ENSG00000237021	RP3-486I3.7	ENST00000448740	2
ENSG00000237135	DDX10P1	ENST00000448545	2
ENSG00000237188	RP11-337C18.8	ENST00000440377	2
ENSG00000237232	ZNF295-AS1	ENST00000412906	2
ENSG00000237235	TRDD2	ENST00000434970	2
ENSG00000237343	RP11-763B22.4	ENST00000455105	2
ENSG00000237463	RP11-280O1.2	ENST00000452283	2
ENSG00000237765	FAM200B	ENST00000422728	2
ENSG00000237773	AC003075.4	ENST00000436175	2
ENSG00000237975	FLG-AS1	ENST00000630125	2
ENSG00000238005	RP11-443B7.1	ENST00000418557	2
ENSG00000238880	RNU7-59P	ENST00000459101	2
ENSG00000238912	Y_RNA	ENST00000391229	2
ENSG00000239039	SNORD13	ENST00000459299	2
ENSG00000239473	RPL7P38	ENST00000488396	2
ENSG00000239615	CTD-2410N18.1	ENST00000498563	2
ENSG00000239665	RP11-295P9.3	ENST00000612284	2
ENSG00000239686	RP11-665C16.1	ENST00000488313	2
ENSG00000239742	RN7SL672P	ENST00000474091	2
ENSG00000239774	RP11-496B10.3	ENST00000472596	2
ENSG00000240184	PCDHGC3	ENST00000308177	2
ENSG00000240216	CPHL1P	ENST00000461341	2
ENSG00000240470	RN7SL346P	ENST00000491561	2
ENSG00000240509	RPL34P18	ENST00000466433	2
ENSG00000241014	RP11-244H3.1	ENST00000417456	2
ENSG00000241054	RP5-1002M8.4	ENST00000470758	2
ENSG00000241127	YAE1D1	ENST00000223273	2
ENSG00000241202	ZIC4-AS1	ENST00000462168	2
ENSG00000241288	RP11-379B18.5	ENST00000594843	2
ENSG00000241978	AKAP2	ENST00000480388	2
ENSG00000242086	LINC00969	ENST00000445707	2
ENSG00000242110	AMACR	ENST00000335606	2
ENSG00000242622	RP11-18H7.1	ENST00000484076	2
ENSG00000243069	ARHGEF26-AS1	ENST00000630930	2
ENSG00000243486	RP11-217E22.5	ENST00000463297	2
ENSG00000243591	RN7SL282P	ENST00000479676	2
ENSG00000243646	IL10RB	ENST00000451065	2
ENSG00000243664	RPS29P12	ENST00000460178	2
ENSG00000243742	RPLP0P2	ENST00000478959	2
ENSG00000243749	TMEM35B	ENST00000373337	2
ENSG00000243927	MRPS6	ENST00000399312	2
ENSG00000244270	RPL32P29	ENST00000497398	2
ENSG00000245017	RP11-181C3.1	ENST00000501499	2
ENSG00000245680	ZNF585B	ENST00000392156	2
ENSG00000245750	DRAIC	ENST00000498938	2
ENSG00000246375	RP11-10L7.1	ENST00000500009	2
ENSG00000246640	RP11-1094H24.4	ENST00000499842	2
ENSG00000248295	DDX43P1	ENST00000510713	2
ENSG00000248307	LINC00616	ENST00000503208	2
ENSG00000248323	LUCAT1	ENST00000511918	2
ENSG00000248330	LINC00613	ENST00000508714	2
ENSG00000248363	CTC-261N6.1	ENST00000510946	2
ENSG00000248610	HSPA8P4	ENST00000511877	2
ENSG00000248807	KRTAP9-12P	ENST00000514388	2
ENSG00000248978	RP11-98H4.1	ENST00000506703	2
ENSG00000249128	RP11-2N5.1	ENST00000503320	2
ENSG00000249295	RP11-241G9.3	ENST00000514270	2
ENSG00000249306	LINC01411	ENST00000511707	2
ENSG00000249346	LINC01016	ENST00000506222	2
ENSG00000249439	HMGN1P14	ENST00000412459	2
ENSG00000249514	CTD-2266L18.1	ENST00000503717	2
ENSG00000249572	CTD-2203K17.1	ENST00000507251	2
ENSG00000249772	CTD-2193P3.2	ENST00000508993	2
ENSG00000249867	RP11-115J23.1	ENST00000513853	2
ENSG00000249870	RP11-481C4.1	ENST00000509833	2
ENSG00000250049	RP11-348J24.2	ENST00000507217	2
ENSG00000250546	RP11-8L2.1	ENST00000508406	2
ENSG00000251002	AE000661.37	ENST00000535351	2
ENSG00000251010	RP11-6L6.7	ENST00000510996	2
ENSG00000251011	TMEM108-AS1	ENST00000504993	2
ENSG00000251138	RP11-81H3.2	ENST00000551726	2
ENSG00000251139	RP11-701P16.2	ENST00000508020	2
ENSG00000251279	CTC-436P18.1	ENST00000506902	2
ENSG00000251503	APITD1-CORT	ENST00000602296	2
ENSG00000251579	RP11-39E3.5	ENST00000505214	2
ENSG00000251682	RP11-631M6.3	ENST00000505325	2
ENSG00000251685	UGT2B27P	ENST00000505092	2
ENSG00000251750	RNU5F-8P	ENST00000515941	2
ENSG00000251837	Y_RNA	ENST00000516028	2
ENSG00000252034	RNY4P37	ENST00000516225	2
ENSG00000252064	Y_RNA	ENST00000516255	2
ENSG00000252188	SNORA40	ENST00000516379	2
ENSG00000252391	RNU6-638P	ENST00000516582	2
ENSG00000252420	Y_RNA	ENST00000516611	2
ENSG00000252660	Y_RNA	ENST00000516851	2
ENSG00000252716	RN7SKP260	ENST00000516907	2
ENSG00000252975	Y_RNA	ENST00000517166	2
ENSG00000253088	Y_RNA	ENST00000517279	2
ENSG00000253097	RNU2-19P	ENST00000517288	2
ENSG00000253186	RP11-726G23.3	ENST00000523185	2
ENSG00000253302	STAU2-AS1	ENST00000517604	2
ENSG00000253320	AZIN1-AS1	ENST00000518978	2
ENSG00000253386	IGHVII-49-1	ENST00000521760	2
ENSG00000253513	RP11-6D1.3	ENST00000523030	2
ENSG00000253535	RP11-624C23.1	ENST00000523578	2
ENSG00000253552	HOXA-AS2	ENST00000517550	2
ENSG00000253553	RP11-586K2.1	ENST00000521936	2
ENSG00000253567	RP11-181B11.2	ENST00000523935	2
ENSG00000253903	RP11-521M14.2	ENST00000521869	2
ENSG00000253949	RP11-790J24.1	ENST00000521504	2
ENSG00000253964	RPL31P40	ENST00000520506	2
ENSG00000254004	ZNF260	ENST00000520608	2
ENSG00000254281	KB-1507C5.4	ENST00000517983	2
ENSG00000254438	RP11-231N3.1	ENST00000532065	2
ENSG00000254440	PBOV1	ENST00000527246	2
ENSG00000254561	RP11-196E1.3	ENST00000532153	2
ENSG00000254638	RP11-356J5.4	ENST00000527589	2
ENSG00000254814	RP11-535A19.1	ENST00000534354	2
ENSG00000254965	C1DP5	ENST00000525775	2
ENSG00000255052	FAM66D	ENST00000434078	2
ENSG00000255062	RP11-712L6.5	ENST00000528876	2
ENSG00000255314	RP11-702F3.3	ENST00000635144	2
ENSG00000255357	RP11-34N19.1	ENST00000531858	2
ENSG00000255468	RP11-867G23.8	ENST00000580881	2
ENSG00000255486	RP11-313I2.13	ENST00000530980	2
ENSG00000255583	RP11-415I12.2	ENST00000541353	2
ENSG00000255624	RP11-564D11.3	ENST00000368895	2
ENSG00000255867	DENND5B-AS1	ENST00000536397	2
ENSG00000256206	RP11-140L24.4	ENST00000555531	2
ENSG00000257654	RP11-497G19.2	ENST00000552718	2
ENSG00000257732	RP11-818F20.5	ENST00000549807	2
ENSG00000257842	NOVA1-AS1	ENST00000552101	2
ENSG00000258289	CHURC1	ENST00000549115	2
ENSG00000258350	SYF2P1	ENST00000550658	2
ENSG00000258413	RP11-665C16.6	ENST00000556183	2
ENSG00000258711	RP11-218E20.3	ENST00000553648	2
ENSG00000258829	CTD-2243E23.1	ENST00000553348	2
ENSG00000258896	SCOCP1	ENST00000554676	2
ENSG00000259072	RP11-96D24.1	ENST00000555636	2
ENSG00000259088	CTD-2017C7.2	ENST00000554859	2
ENSG00000259164	RP11-463C8.4	ENST00000557752	2
ENSG00000259194	RP11-108K3.4	ENST00000558785	2
ENSG00000259265	RP11-809H16.4	ENST00000559495	2
ENSG00000259288	BUB1B-PAK6	ENST00000441369	2
ENSG00000259345	RP11-624L4.1	ENST00000561058	2
ENSG00000259349	RP11-15E18.1	ENST00000558027	2
ENSG00000259431	THTPA	ENST00000554789	2
ENSG00000259602	RP11-138E16.1	ENST00000559620	2
ENSG00000259641	PCAT29	ENST00000558411	2
ENSG00000259700	RP11-485O10.3	ENST00000560237	2
ENSG00000260018	RP11-505K9.1	ENST00000565382	2
ENSG00000260341	C2orf69P2	ENST00000562032	2
ENSG00000260537	RP11-529K1.3	ENST00000443119	2
ENSG00000260600	RP11-109D24.1	ENST00000562568	2
ENSG00000260743	RP11-255C15.3	ENST00000569932	2
ENSG00000261078	RP11-481J2.1	ENST00000566019	2
ENSG00000261218	RP11-960L18.1	ENST00000565674	2
ENSG00000261227	AC140912.1	ENST00000561802	2
ENSG00000261553	RP11-29G8.3	ENST00000563635	2
ENSG00000261689	AGGF1P4	ENST00000568249	2
ENSG00000261872	RP5-867C24.5	ENST00000572193	2
ENSG00000262259	MTND4LP24	ENST00000572277	2
ENSG00000262468	LINC01569	ENST00000573042	2
ENSG00000262721	AC106782.20	ENST00000572471	2
ENSG00000264408	MIR4470	ENST00000583453	2
ENSG00000264511	MIR3678	ENST00000578455	2
ENSG00000264613	RN7SL290P	ENST00000578661	2
ENSG00000265253	MIR4446	ENST00000578505	2
ENSG00000265289	AC104984.4	ENST00000583250	2
ENSG00000265359	RP5-1110E20.1	ENST00000579136	2
ENSG00000265554	RP11-419J16.1	ENST00000582470	2
ENSG00000265656	RP11-13N13.6	ENST00000578583	2
ENSG00000265683	RP11-173M1.5	ENST00000582878	2
ENSG00000265846	MIR4276	ENST00000584832	2
ENSG00000266222	RP11-433M22.1	ENST00000579033	2
ENSG00000266313	RP11-173M1.4	ENST00000581118	2
ENSG00000266412	NCOA4	ENST00000578454	2
ENSG00000266472	MRPS21	ENST00000581066	2
ENSG00000266478	MIR5197	ENST00000583721	2
ENSG00000266561	CTD-2200P10.3	ENST00000578177	2
ENSG00000266865	RP11-848P1.9	ENST00000578883	2
ENSG00000267150	RP11-411B10.2	ENST00000591211	2
ENSG00000267173	CTC-512J12.6	ENST00000588212	2
ENSG00000267228	RP11-49K24.6	ENST00000588705	2
ENSG00000267243	AC005307.4	ENST00000585697	2
ENSG00000267277	CTD-2342J14.6	ENST00000590399	2
ENSG00000267360	CTC-454I21.3	ENST00000590245	2
ENSG00000267508	ZNF285	ENST00000544719	2
ENSG00000267649	CTD-2587H24.10	ENST00000585911	2
ENSG00000267653	RP1-193H18.3	ENST00000585537	2
ENSG00000267827	CTC-471J1.8	ENST00000598982	2
ENSG00000267858	MZF1-AS1	ENST00000593642	2
ENSG00000268062	TOP1P1	ENST00000599419	2
ENSG00000268173	AC007192.4	ENST00000593731	2
ENSG00000268471	MIR4453	ENST00000584019	2
ENSG00000269289	CTB-92J24.3	ENST00000596326	2
ENSG00000269873	CTD-2587H19.3	ENST00000597355	2
ENSG00000269883	RP11-463C8.7	ENST00000600936	2
ENSG00000269955	C7orf55-LUC7L2	ENST00000541515	2
ENSG00000269985	RP1-232P20.1	ENST00000602284	2
ENSG00000270022	RNU12	ENST00000602478	2
ENSG00000270095	RP11-214K3.18	ENST00000602558	2
ENSG00000270820	RP11-355B11.2	ENST00000603652	2
ENSG00000271456	CTC-661I16.2	ENST00000604358	2
ENSG00000271494	CTB-23I7.3	ENST00000603595	2
ENSG00000271649	LINC00904	ENST00000604453	2
ENSG00000271762	RP11-213H15.4	ENST00000607854	2
ENSG00000272031	ANKRD34A	ENST00000606888	2
ENSG00000272051	Y_RNA	ENST00000606692	2
ENSG00000272205	RP11-277B15.3	ENST00000606967	2
ENSG00000272371	RP11-25O10.2	ENST00000607321	2
ENSG00000272601	RP11-155G14.5	ENST00000478818	2
ENSG00000272606	RP11-554J4.1	ENST00000608113	2
ENSG00000272654	RP11-422P24.11	ENST00000608236	2
ENSG00000272657	AP000320.7	ENST00000362077	2
ENSG00000272692	RP11-399K21.14	ENST00000609200	2
ENSG00000272844	RP11-484K9.4	ENST00000609673	2
ENSG00000272886	DCP1A	ENST00000294241	2
ENSG00000272894	RP5-1159O4.1	ENST00000609307	2
ENSG00000272902	RP11-299H21.1	ENST00000610202	2
ENSG00000273391	RP11-634H22.1	ENST00000608266	2
ENSG00000273698	MRPL57P1	ENST00000621486	2
ENSG00000274396	HOTAIRM1_4	ENST00000617934	2
ENSG00000274492	RP11-976B16.1	ENST00000613917	2
ENSG00000274750	HIST1H3E	ENST00000634733	2
ENSG00000274864	HOTAIRM1_3	ENST00000619974	2
ENSG00000275017	RP11-317B17.4	ENST00000622148	2
ENSG00000275052	PPP4R3B	ENST00000611717	2
ENSG00000275066	SYNRG	ENST00000621605	2
ENSG00000275185	RP13-753N3.3	ENST00000614165	2
ENSG00000275194	RP1-27C22.1	ENST00000615678	2
ENSG00000275202	RP11-156K23.3	ENST00000619666	2
ENSG00000275512	RP11-322E11.2	ENST00000612496	2
ENSG00000275728	RP4-777L9.3	ENST00000616301	2
ENSG00000275966	RP11-1055B8.9	ENST00000617652	2
ENSG00000276027	RNU12	ENST00000362512	2
ENSG00000276089	DLEU1_1	ENST00000618107	2
ENSG00000276216	CH17-373J23.1	ENST00000618589	2
ENSG00000277694	HOTAIRM1_5	ENST00000619311	2
ENSG00000277855	RP11-154H23.4	ENST00000613067	2
ENSG00000277895	RP11-114F3.4	ENST00000610945	2
ENSG00000277911	RP11-333J10.2	ENST00000613270	2
ENSG00000278683	RP11-132A1.6	ENST00000611491	2
ENSG00000278923	AP005242.1	ENST00000623604	2
ENSG00000278987	LA16c-431H6.7	ENST00000624137	2
ENSG00000278989	RP11-762L8.6	ENST00000624124	2
ENSG00000279040	RP11-667K14.13	ENST00000623952	2
ENSG00000279061	RP3-332O11.2	ENST00000624123	2
ENSG00000279113	RP13-895J2.8	ENST00000623871	2
ENSG00000279306	RP5-915N17.11	ENST00000623748	2
ENSG00000279378	RP11-70D24.1	ENST00000624606	2
ENSG00000279447	RP4-737E23.6	ENST00000624142	2
ENSG00000279703	RP11-364P22.3	ENST00000625016	2
ENSG00000279954	WI2-85898F10.2	ENST00000623717	2
ENSG00000280186	RP11-483I13.6	ENST00000622910	2
ENSG00000281112	AL355480.2	ENST00000628958	2
ENSG00000281189	GHET1	ENST00000627071	2
ENSG00000281692	PACRG-AS1	ENST00000626335	2
ENSG00000283156	RP11-646I6.3	ENST00000635939	2
ENSG00000283199	ABC13-47488600E17.1	ENST00000637024	2
ENSG00000283405	RP5-872K7.8	ENST00000636173	2
ENSG00000283442	U4	ENST00000638126	2
ENSG00000283485	AC090094.1	ENST00000541428	2
ENSG00000283623	AL022067.1	ENST00000635758	2
ENSG00000000419	DPM1	ENST00000494752	1
ENSG00000000971	CFH	ENST00000470918	1
ENSG00000001084	GCLC	ENST00000229416	1
ENSG00000001561	ENPP4	ENST00000321037	1
ENSG00000001629	ANKIB1	ENST00000413588	1
ENSG00000001631	KRIT1	ENST00000470309	1
ENSG00000002016	RAD52	ENST00000397230	1
ENSG00000002919	SNX11	ENST00000359238	1
ENSG00000003147	ICA1	ENST00000317367	1
ENSG00000003249	DBNDD1	ENST00000568330	1
ENSG00000003400	CASP10	ENST00000471191	1
ENSG00000003402	CFLAR	ENST00000433445	1
ENSG00000003756	RBM5	ENST00000347869	1
ENSG00000004139	SARM1	ENST00000582323	1
ENSG00000004142	POLDIP2	ENST00000540200	1
ENSG00000004487	KDM1A	ENST00000356634	1
ENSG00000004866	ST7	ENST00000464020	1
ENSG00000004897	CDC27	ENST00000066544	1
ENSG00000004975	DVL2	ENST00000005340	1
ENSG00000005007	UPF1	ENST00000594504	1
ENSG00000005156	LIG3	ENST00000262327	1
ENSG00000005175	RPAP3	ENST00000005386	1
ENSG00000005187	ACSM3	ENST00000440284	1
ENSG00000005189	AC004381.6	ENST00000563068	1
ENSG00000005238	FAM214B	ENST00000605244	1
ENSG00000005339	CREBBP	ENST00000262367	1
ENSG00000005379	TSPOAP1	ENST00000578511	1
ENSG00000005421	PON1	ENST00000470502	1
ENSG00000005436	GCFC2	ENST00000321027	1
ENSG00000005469	CROT	ENST00000331536	1
ENSG00000005471	ABCB4	ENST00000440025	1
ENSG00000005483	KMT2E	ENST00000482560	1
ENSG00000005801	ZNF195	ENST00000005082	1
ENSG00000005810	MYCBP2	ENST00000357337	1
ENSG00000005812	FBXL3	ENST00000477982	1
ENSG00000005889	ZFX	ENST00000480195	1
ENSG00000006025	OSBPL7	ENST00000579728	1
ENSG00000006210	CX3CL1	ENST00000565912	1
ENSG00000006282	SPATA20	ENST00000504334	1
ENSG00000006432	MAP3K9	ENST00000381250	1
ENSG00000006451	RALA	ENST00000434466	1
ENSG00000006468	ETV1	ENST00000472931	1
ENSG00000006530	AGK	ENST00000355413	1
ENSG00000006576	PHTF2	ENST00000275575	1
ENSG00000006607	FARP2	ENST00000264042	1
ENSG00000006625	GGCT	ENST00000426081	1
ENSG00000006634	DBF4	ENST00000498726	1
ENSG00000006747	SCIN	ENST00000476649	1
ENSG00000006831	ADIPOR2	ENST00000535774	1
ENSG00000007047	MARK4	ENST00000590897	1
ENSG00000007168	PAFAH1B1	ENST00000570400	1
ENSG00000007923	DNAJC11	ENST00000451196	1
ENSG00000008018	PSMB1	ENST00000262193	1
ENSG00000008130	NADK	ENST00000342348	1
ENSG00000008256	CYTH3	ENST00000478541	1
ENSG00000008277	ADAM22	ENST00000265727	1
ENSG00000008282	SYPL1	ENST00000464029	1
ENSG00000008294	SPAG9	ENST00000262013	1
ENSG00000008311	AASS	ENST00000417368	1
ENSG00000008405	CRY1	ENST00000008527	1
ENSG00000008441	NFIX	ENST00000358552	1
ENSG00000008513	ST3GAL1	ENST00000399640	1
ENSG00000008735	MAPK8IP2	ENST00000329492	1
ENSG00000008838	MED24	ENST00000580720	1
ENSG00000008853	RHOBTB2	ENST00000519685	1
ENSG00000008952	SEC62	ENST00000469890	1
ENSG00000009413	REV3L	ENST00000462119	1
ENSG00000009694	TENM1	ENST00000461429	1
ENSG00000009765	IYD	ENST00000229447	1
ENSG00000009780	FAM76A	ENST00000010299	1
ENSG00000009830	POMT2	ENST00000556880	1
ENSG00000009844	VTA1	ENST00000367621	1
ENSG00000010165	METTL13	ENST00000361735	1
ENSG00000010219	DYRK4	ENST00000010132	1
ENSG00000010318	PHF7	ENST00000347025	1
ENSG00000010704	HFE	ENST00000309234	1
ENSG00000010810	FYN	ENST00000495927	1
ENSG00000010818	HIVEP2	ENST00000012134	1
ENSG00000010932	FMO1	ENST00000469112	1
ENSG00000011114	BTBD7	ENST00000555525	1
ENSG00000011132	APBA3	ENST00000316757	1
ENSG00000011143	MKS1	ENST00000313863	1
ENSG00000011260	UTP18	ENST00000582150	1
ENSG00000011295	TTC19	ENST00000466729	1
ENSG00000011376	LARS2	ENST00000265537	1
ENSG00000011405	PIK3C2A	ENST00000503729	1
ENSG00000011465	DCN	ENST00000393155	1
ENSG00000011566	MAP4K3	ENST00000263881	1
ENSG00000011638	TMEM159	ENST00000233047	1
ENSG00000012048	BRCA1	ENST00000473961	1
ENSG00000012061	ERCC1	ENST00000013807	1
ENSG00000012174	MBTPS2	ENST00000365779	1
ENSG00000012232	EXTL3	ENST00000519886	1
ENSG00000012660	ELOVL5	ENST00000304434	1
ENSG00000012822	CALCOCO1	ENST00000262059	1
ENSG00000013016	EHD3	ENST00000322054	1
ENSG00000013275	PSMC4	ENST00000157812	1
ENSG00000013364	MVP	ENST00000357402	1
ENSG00000013523	ANGEL1	ENST00000251089	1
ENSG00000013563	DNASE1L1	ENST00000497242	1
ENSG00000013810	TACC3	ENST00000470136	1
ENSG00000014123	UFL1	ENST00000369278	1
ENSG00000014257	ACPP	ENST00000336375	1
ENSG00000015133	CCDC88C	ENST00000331194	1
ENSG00000015153	YAF2	ENST00000546726	1
ENSG00000015171	ZMYND11	ENST00000309776	1
ENSG00000015479	MATR3	ENST00000394805	1
ENSG00000015676	NUDCD3	ENST00000355451	1
ENSG00000016082	ISL1	ENST00000230658	1
ENSG00000016391	CHDH	ENST00000315251	1
ENSG00000016490	CLCA1	ENST00000234701	1
ENSG00000016602	CLCA4	ENST00000370563	1
ENSG00000016864	GLT8D1	ENST00000394783	1
ENSG00000017260	ATP2C1	ENST00000328560	1
ENSG00000017797	RALBP1	ENST00000019317	1
ENSG00000018189	RUFY3	ENST00000226328	1
ENSG00000018236	CNTN1	ENST00000547849	1
ENSG00000018510	AGPS	ENST00000264167	1
ENSG00000018625	ATP1A2	ENST00000447527	1
ENSG00000018699	TTC27	ENST00000433416	1
ENSG00000019144	PHLDB1	ENST00000526699	1
ENSG00000020426	MNAT1	ENST00000554002	1
ENSG00000020577	SAMD4A	ENST00000555091	1
ENSG00000021300	PLEKHB1	ENST00000545106	1
ENSG00000021645	NRXN3	ENST00000634266	1
ENSG00000021776	AQR	ENST00000559767	1
ENSG00000022267	FHL1	ENST00000345434	1
ENSG00000022567	SLC45A4	ENST00000024061	1
ENSG00000022840	RNF10	ENST00000325954	1
ENSG00000023171	GRAMD1B	ENST00000450171	1
ENSG00000023228	NDUFS1	ENST00000233190	1
ENSG00000023516	AKAP11	ENST00000025301	1
ENSG00000023572	GLRX2	ENST00000367439	1
ENSG00000024526	DEPDC1	ENST00000489862	1
ENSG00000025293	PHF20	ENST00000486408	1
ENSG00000025800	KPNA6	ENST00000373625	1
ENSG00000026025	VIM	ENST00000478317	1
ENSG00000026652	AGPAT4	ENST00000437165	1
ENSG00000026751	SLAMF7	ENST00000359331	1
ENSG00000026950	BTN3A1	ENST00000082468	1
ENSG00000027075	PRKCH	ENST00000555628	1
ENSG00000028203	VEZT	ENST00000397792	1
ENSG00000028528	SNX1	ENST00000261889	1
ENSG00000028839	TBPL1	ENST00000477527	1
ENSG00000029364	SLC39A9	ENST00000031146	1
ENSG00000029639	TFB1M	ENST00000468889	1
ENSG00000029725	RABEP1	ENST00000570487	1
ENSG00000030066	NUP160	ENST00000526569	1
ENSG00000030110	BAK1	ENST00000360661	1
ENSG00000031823	RANBP3	ENST00000586344	1
ENSG00000032742	IFT88	ENST00000319980	1
ENSG00000033030	ZCCHC8	ENST00000540586	1
ENSG00000033050	ABCF2	ENST00000222388	1
ENSG00000033122	LRRC7	ENST00000441830	1
ENSG00000033170	FUT8	ENST00000358307	1
ENSG00000033178	UBA6	ENST00000514261	1
ENSG00000033327	GAB2	ENST00000361507	1
ENSG00000033800	PIAS1	ENST00000611270	1
ENSG00000034239	EFCAB1	ENST00000519425	1
ENSG00000034510	TMSB10	ENST00000233143	1
ENSG00000034533	ASTE1	ENST00000504964	1
ENSG00000034677	RNF19A	ENST00000341084	1
ENSG00000034693	PEX3	ENST00000367591	1
ENSG00000035115	SH3YL1	ENST00000403657	1
ENSG00000035403	VCL	ENST00000436396	1
ENSG00000035687	ADSS	ENST00000366535	1
ENSG00000036054	TBC1D23	ENST00000344949	1
ENSG00000036257	CUL3	ENST00000264414	1
ENSG00000036448	MYOM2	ENST00000520072	1
ENSG00000036549	ZZZ3	ENST00000370801	1
ENSG00000036672	USP2	ENST00000260187	1
ENSG00000038002	AGA	ENST00000264595	1
ENSG00000038219	BOD1L1	ENST00000509897	1
ENSG00000038382	TRIO	ENST00000344204	1
ENSG00000038532	CLEC16A	ENST00000409552	1
ENSG00000039123	SKIV2L2	ENST00000505565	1
ENSG00000039139	DNAH5	ENST00000265104	1
ENSG00000039319	ZFYVE16	ENST00000509558	1
ENSG00000040199	PHLPP2	ENST00000568954	1
ENSG00000040275	SPDL1	ENST00000265295	1
ENSG00000040341	STAU2	ENST00000355780	1
ENSG00000040731	CDH10	ENST00000502921	1
ENSG00000041357	PSMA4	ENST00000560737	1
ENSG00000041802	LSG1	ENST00000427461	1
ENSG00000041982	TNC	ENST00000341037	1
ENSG00000042429	MED17	ENST00000529626	1
ENSG00000042832	TG	ENST00000520769	1
ENSG00000043093	DCUN1D1	ENST00000492563	1
ENSG00000043355	ZIC2	ENST00000490085	1
ENSG00000043462	LCP2	ENST00000520322	1
ENSG00000043514	TRIT1	ENST00000441669	1
ENSG00000044115	CTNNA1	ENST00000522730	1
ENSG00000046647	GEMIN8	ENST00000332885	1
ENSG00000046651	OFD1	ENST00000340096	1
ENSG00000047056	WDR37	ENST00000482165	1
ENSG00000047188	YTHDC2	ENST00000503857	1
ENSG00000047249	ATP6V1H	ENST00000520188	1
ENSG00000047457	CP	ENST00000460674	1
ENSG00000047579	DTNBP1	ENST00000338950	1
ENSG00000047849	MAP4	ENST00000360240	1
ENSG00000047936	ROS1	ENST00000368507	1
ENSG00000048028	USP28	ENST00000003302	1
ENSG00000048392	RRM2B	ENST00000251810	1
ENSG00000048405	ZNF800	ENST00000393312	1
ENSG00000048462	TNFRSF17	ENST00000562385	1
ENSG00000048540	LMO3	ENST00000616247	1
ENSG00000048544	MRPS10	ENST00000053468	1
ENSG00000048545	GUCA1A	ENST00000053469	1
ENSG00000048707	VPS13D	ENST00000476045	1
ENSG00000048828	FAM120A	ENST00000277165	1
ENSG00000049167	ERCC8	ENST00000462279	1
ENSG00000049192	ADAMTS6	ENST00000381052	1
ENSG00000049246	PER3	ENST00000463106	1
ENSG00000049283	EPN3	ENST00000507709	1
ENSG00000049449	RCN1	ENST00000528630	1
ENSG00000049618	ARID1B	ENST00000319584	1
ENSG00000049759	NEDD4L	ENST00000456986	1
ENSG00000049769	PPP1R3F	ENST00000055335	1
ENSG00000050130	JKAMP	ENST00000261247	1
ENSG00000050344	NFE2L3	ENST00000056233	1
ENSG00000050405	LIMA1	ENST00000547825	1
ENSG00000050438	SLC4A8	ENST00000550211	1
ENSG00000050820	BCAR1	ENST00000162330	1
ENSG00000051108	HERPUD1	ENST00000300302	1
ENSG00000051341	POLQ	ENST00000621776	1
ENSG00000051382	PIK3CB	ENST00000461451	1
ENSG00000051620	HEBP2	ENST00000367697	1
ENSG00000052795	FNIP2	ENST00000512986	1
ENSG00000052841	TTC17	ENST00000530469	1
ENSG00000053108	FSTL4	ENST00000509525	1
ENSG00000053254	FOXN3	ENST00000557261	1
ENSG00000053524	MCF2L2	ENST00000475664	1
ENSG00000053747	LAMA3	ENST00000313654	1
ENSG00000053770	AP5M1	ENST00000554863	1
ENSG00000053900	ANAPC4	ENST00000315368	1
ENSG00000054148	PHPT1	ENST00000247665	1
ENSG00000054267	ARID4B	ENST00000474401	1
ENSG00000054523	KIF1B	ENST00000377081	1
ENSG00000054654	SYNE2	ENST00000394768	1
ENSG00000054938	CHRDL2	ENST00000376324	1
ENSG00000055163	CYFIP2	ENST00000435847	1
ENSG00000055332	EIF2AK2	ENST00000233057	1
ENSG00000055609	KMT2C	ENST00000360104	1
ENSG00000055917	PUM2	ENST00000319801	1
ENSG00000055957	ITIH1	ENST00000273283	1
ENSG00000056487	PHF21B	ENST00000414269	1
ENSG00000056586	RC3H2	ENST00000471874	1
ENSG00000056736	IL17RB	ENST00000288167	1
ENSG00000057252	SOAT1	ENST00000426956	1
ENSG00000057294	PKP2	ENST00000070846	1
ENSG00000057608	GDI2	ENST00000447751	1
ENSG00000057935	MTA3	ENST00000493983	1
ENSG00000058063	ATP11B	ENST00000323116	1
ENSG00000058091	CDK14	ENST00000265741	1
ENSG00000058335	RASGRF1	ENST00000560286	1
ENSG00000058729	RIOK2	ENST00000283109	1
ENSG00000059122	FLYWCH1	ENST00000253928	1
ENSG00000059377	TBXAS1	ENST00000263552	1
ENSG00000059378	PARP12	ENST00000489383	1
ENSG00000059573	ALDH18A1	ENST00000489386	1
ENSG00000059691	GATB	ENST00000507592	1
ENSG00000059758	CDK17	ENST00000548734	1
ENSG00000059769	DNAJC25	ENST00000313525	1
ENSG00000060140	STYK1	ENST00000075503	1
ENSG00000060339	CCAR1	ENST00000265872	1
ENSG00000060688	SNRNP40	ENST00000263694	1
ENSG00000060718	COL11A1	ENST00000475980	1
ENSG00000061656	SPAG4	ENST00000430878	1
ENSG00000061987	MON2	ENST00000393629	1
ENSG00000062038	CDH3	ENST00000565453	1
ENSG00000062194	GPBP1	ENST00000309096	1
ENSG00000062485	CS	ENST00000351328	1
ENSG00000062524	LTK	ENST00000569283	1
ENSG00000062582	MRPS24	ENST00000467084	1
ENSG00000062822	POLD1	ENST00000440232	1
ENSG00000063176	SPHK2	ENST00000426514	1
ENSG00000063177	RPL18	ENST00000547892	1
ENSG00000063241	ISOC2	ENST00000587226	1
ENSG00000063244	U2AF2	ENST00000308924	1
ENSG00000063978	RNF4	ENST00000314289	1
ENSG00000064042	LIMCH1	ENST00000514096	1
ENSG00000064102	ASUN	ENST00000261191	1
ENSG00000064115	TM7SF3	ENST00000512808	1
ENSG00000064218	DMRT3	ENST00000417254	1
ENSG00000064225	ST3GAL6	ENST00000265261	1
ENSG00000064393	HIPK2	ENST00000406875	1
ENSG00000064601	CTSA	ENST00000191018	1
ENSG00000064652	SNX24	ENST00000510914	1
ENSG00000064726	BTBD1	ENST00000261721	1
ENSG00000064933	PMS1	ENST00000452382	1
ENSG00000064961	HMG20B	ENST00000262949	1
ENSG00000065135	GNAI3	ENST00000369851	1
ENSG00000065150	IPO5	ENST00000403772	1
ENSG00000065154	OAT	ENST00000368845	1
ENSG00000065325	GLP2R	ENST00000304773	1
ENSG00000065357	DGKA	ENST00000549079	1
ENSG00000065361	ERBB3	ENST00000549472	1
ENSG00000065457	ADAT1	ENST00000307921	1
ENSG00000065485	PDIA5	ENST00000316218	1
ENSG00000065518	NDUFB4	ENST00000184266	1
ENSG00000065526	SPEN	ENST00000375759	1
ENSG00000065548	ZC3H15	ENST00000337859	1
ENSG00000065559	MAP2K4	ENST00000353533	1
ENSG00000065600	TMEM206	ENST00000261455	1
ENSG00000065618	COL17A1	ENST00000353479	1
ENSG00000065717	TLE2	ENST00000591529	1
ENSG00000065882	TBC1D1	ENST00000443855	1
ENSG00000065970	FOXJ2	ENST00000162391	1
ENSG00000065978	YBX1	ENST00000321358	1
ENSG00000066027	PPP2R5A	ENST00000261461	1
ENSG00000066032	CTNNA2	ENST00000343114	1
ENSG00000066044	ELAVL1	ENST00000596459	1
ENSG00000066117	SMARCD1	ENST00000549274	1
ENSG00000066136	NFYC	ENST00000414185	1
ENSG00000066248	NGEF	ENST00000264051	1
ENSG00000066382	MPPED2	ENST00000524667	1
ENSG00000066455	GOLGA5	ENST00000554700	1
ENSG00000066629	EML1	ENST00000553720	1
ENSG00000066777	ARFGEF1	ENST00000262215	1
ENSG00000066855	MTFR1	ENST00000527553	1
ENSG00000066926	FECH	ENST00000262093	1
ENSG00000066933	MYO9A	ENST00000563071	1
ENSG00000067048	DDX3Y	ENST00000336079	1
ENSG00000067057	PFKP	ENST00000381125	1
ENSG00000067066	SP100	ENST00000494901	1
ENSG00000067082	KLF6	ENST00000380946	1
ENSG00000067208	EVI5	ENST00000474806	1
ENSG00000067221	STOML1	ENST00000316900	1
ENSG00000067225	PKM	ENST00000561609	1
ENSG00000067334	DNTTIP2	ENST00000359208	1
ENSG00000067365	METTL22	ENST00000163678	1
ENSG00000067369	TP53BP1	ENST00000382039	1
ENSG00000067533	RRP15	ENST00000366932	1
ENSG00000067704	IARS2	ENST00000366922	1
ENSG00000067715	SYT1	ENST00000549559	1
ENSG00000067798	NAV3	ENST00000549464	1
ENSG00000067829	IDH3G	ENST00000370093	1
ENSG00000067836	ROGDI	ENST00000586336	1
ENSG00000067900	ROCK1	ENST00000584875	1
ENSG00000067955	CBFB	ENST00000567947	1
ENSG00000068024	HDAC4	ENST00000463007	1
ENSG00000068079	IFI35	ENST00000538473	1
ENSG00000068489	PRR11	ENST00000262293	1
ENSG00000068650	ATP11A	ENST00000459011	1
ENSG00000068697	LAPTM4A	ENST00000175091	1
ENSG00000068724	TTC7A	ENST00000474321	1
ENSG00000068745	IP6K2	ENST00000328631	1
ENSG00000068796	KIF2A	ENST00000506857	1
ENSG00000068885	IFT80	ENST00000326448	1
ENSG00000068912	ERLEC1	ENST00000185150	1
ENSG00000069018	TRPC7	ENST00000352189	1
ENSG00000069020	MAST4	ENST00000261569	1
ENSG00000069248	NUP133	ENST00000261396	1
ENSG00000069329	VPS35	ENST00000565228	1
ENSG00000069345	DNAJA2	ENST00000317089	1
ENSG00000069667	RORA	ENST00000449337	1
ENSG00000069702	TGFBR3	ENST00000212355	1
ENSG00000069712	KIAA1107	ENST00000636278	1
ENSG00000069849	ATP1B3	ENST00000475483	1
ENSG00000070061	IKBKAP	ENST00000374647	1
ENSG00000070081	NUCB2	ENST00000526120	1
ENSG00000070269	TMEM260	ENST00000553335	1
ENSG00000070366	SMG6	ENST00000570668	1
ENSG00000070367	EXOC5	ENST00000340918	1
ENSG00000070371	CLTCL1	ENST00000540896	1
ENSG00000070501	POLB	ENST00000517393	1
ENSG00000070718	AP3M2	ENST00000174653	1
ENSG00000070761	CFAP20	ENST00000262498	1
ENSG00000070778	PTPN21	ENST00000556564	1
ENSG00000070961	ATP2B1	ENST00000393164	1
ENSG00000071054	MAP4K4	ENST00000477711	1
ENSG00000071127	WDR1	ENST00000264785	1
ENSG00000071189	SNX13	ENST00000409076	1
ENSG00000071203	MS4A12	ENST00000016913	1
ENSG00000071205	ARHGAP10	ENST00000513548	1
ENSG00000071243	ING3	ENST00000315870	1
ENSG00000071994	PDCD2	ENST00000167218	1
ENSG00000072042	RDH11	ENST00000428130	1
ENSG00000072062	PRKACA	ENST00000350356	1
ENSG00000072080	SPP2	ENST00000168148	1
ENSG00000072121	ZFYVE26	ENST00000347230	1
ENSG00000072133	RPS6KA6	ENST00000495332	1
ENSG00000072134	EPN2	ENST00000584150	1
ENSG00000072195	SPEG	ENST00000435853	1
ENSG00000072210	ALDH3A2	ENST00000574597	1
ENSG00000072274	TFRC	ENST00000360110	1
ENSG00000072401	UBE2D1	ENST00000473824	1
ENSG00000072506	HSD17B10	ENST00000168216	1
ENSG00000072518	MARK2	ENST00000350490	1
ENSG00000072736	NFATC3	ENST00000562926	1
ENSG00000072756	TRNT1	ENST00000251607	1
ENSG00000072778	ACADVL	ENST00000578711	1
ENSG00000072849	DERL2	ENST00000158771	1
ENSG00000072858	SIDT1	ENST00000393830	1
ENSG00000073331	ALPK1	ENST00000458497	1
ENSG00000073350	LLGL2	ENST00000545227	1
ENSG00000073464	CLCN4	ENST00000380833	1
ENSG00000073578	SDHA	ENST00000514027	1
ENSG00000073584	SMARCE1	ENST00000377808	1
ENSG00000073711	PPP2R3A	ENST00000264977	1
ENSG00000073737	DHRS9	ENST00000357546	1
ENSG00000073756	PTGS2	ENST00000466691	1
ENSG00000073792	IGF2BP2	ENST00000494906	1
ENSG00000073803	MAP3K13	ENST00000265026	1
ENSG00000073849	ST6GAL1	ENST00000438590	1
ENSG00000073910	FRY	ENST00000602645	1
ENSG00000074047	GLI2	ENST00000418323	1
ENSG00000074266	EED	ENST00000528250	1
ENSG00000074356	NCBP3	ENST00000389005	1
ENSG00000074410	CA12	ENST00000558287	1
ENSG00000074582	BCS1L	ENST00000359273	1
ENSG00000074621	SLC24A1	ENST00000261892	1
ENSG00000074657	ZNF532	ENST00000585662	1
ENSG00000074695	LMAN1	ENST00000587940	1
ENSG00000074800	ENO1	ENST00000464920	1
ENSG00000074803	SLC12A1	ENST00000558252	1
ENSG00000075035	WSCD2	ENST00000546811	1
ENSG00000075131	TIPIN	ENST00000261881	1
ENSG00000075142	SRI	ENST00000265729	1
ENSG00000075151	EIF4G3	ENST00000356916	1
ENSG00000075188	NUP37	ENST00000543021	1
ENSG00000075223	SEMA3C	ENST00000411788	1
ENSG00000075239	ACAT1	ENST00000528370	1
ENSG00000075292	ZNF638	ENST00000483421	1
ENSG00000075391	RASAL2	ENST00000463079	1
ENSG00000075413	MARK3	ENST00000561071	1
ENSG00000075415	SLC25A3	ENST00000547908	1
ENSG00000075426	FOSL2	ENST00000264716	1
ENSG00000075539	FRYL	ENST00000502925	1
ENSG00000075651	PLD1	ENST00000418087	1
ENSG00000075673	ATP12A	ENST00000218548	1
ENSG00000075711	DLG1	ENST00000422288	1
ENSG00000075785	RAB7A	ENST00000464496	1
ENSG00000075826	SEC31B	ENST00000492667	1
ENSG00000075884	ARHGAP15	ENST00000548242	1
ENSG00000075945	KIFAP3	ENST00000361580	1
ENSG00000076043	REXO2	ENST00000265881	1
ENSG00000076108	BAZ2A	ENST00000550730	1
ENSG00000076321	KLHL20	ENST00000209884	1
ENSG00000076351	SLC46A1	ENST00000582590	1
ENSG00000076382	SPAG5	ENST00000321765	1
ENSG00000076554	TPD52	ENST00000379096	1
ENSG00000076641	PAG1	ENST00000522811	1
ENSG00000076685	NT5C2	ENST00000470228	1
ENSG00000076924	XAB2	ENST00000358368	1
ENSG00000076928	ARHGEF1	ENST00000337665	1
ENSG00000076944	STXBP2	ENST00000221283	1
ENSG00000077063	CTTNBP2	ENST00000160373	1
ENSG00000077092	RARB	ENST00000458646	1
ENSG00000077097	TOP2B	ENST00000470132	1
ENSG00000077150	NFKB2	ENST00000189444	1
ENSG00000077157	PPP1R12B	ENST00000356764	1
ENSG00000077235	GTF3C1	ENST00000570129	1
ENSG00000077238	IL4R	ENST00000395762	1
ENSG00000077254	USP33	ENST00000472462	1
ENSG00000077264	PAK3	ENST00000487802	1
ENSG00000077348	EXOSC5	ENST00000221233	1
ENSG00000077935	SMC1B	ENST00000357450	1
ENSG00000078018	MAP2	ENST00000360351	1
ENSG00000078043	PIAS2	ENST00000587810	1
ENSG00000078053	AMPH	ENST00000441628	1
ENSG00000078070	MCCC1	ENST00000265594	1
ENSG00000078098	FAP	ENST00000497414	1
ENSG00000078114	NEBL	ENST00000434381	1
ENSG00000078140	UBE2K	ENST00000261427	1
ENSG00000078142	PIK3C3	ENST00000587328	1
ENSG00000078177	N4BP2	ENST00000513269	1
ENSG00000078304	PPP2R5C	ENST00000350249	1
ENSG00000078369	GNB1	ENST00000437146	1
ENSG00000078399	HOXA9	ENST00000343483	1
ENSG00000078401	EDN1	ENST00000379375	1
ENSG00000078487	ZCWPW1	ENST00000471336	1
ENSG00000078687	TNRC6C	ENST00000588549	1
ENSG00000078699	CBFA2T2	ENST00000543126	1
ENSG00000078967	UBE2D4	ENST00000222402	1
ENSG00000079101	CLUL1	ENST00000584046	1
ENSG00000079102	RUNX1T1	ENST00000521078	1
ENSG00000079112	CDH17	ENST00000027335	1
ENSG00000079156	OSBPL6	ENST00000190611	1
ENSG00000079308	TNS1	ENST00000480416	1
ENSG00000079385	CEACAM1	ENST00000600172	1
ENSG00000079459	FDFT1	ENST00000525777	1
ENSG00000079785	DDX1	ENST00000470674	1
ENSG00000079819	EPB41L2	ENST00000530757	1
ENSG00000079841	RIMS1	ENST00000425662	1
ENSG00000079999	KEAP1	ENST00000591039	1
ENSG00000080224	EPHA6	ENST00000477384	1
ENSG00000080293	SCTR	ENST00000485440	1
ENSG00000080298	RFX3	ENST00000420720	1
ENSG00000080345	RIF1	ENST00000243326	1
ENSG00000080802	CNOT4	ENST00000315544	1
ENSG00000080819	CPOX	ENST00000264193	1
ENSG00000080823	MOK	ENST00000193029	1
ENSG00000080986	NDC80	ENST00000574096	1
ENSG00000081014	AP4E1	ENST00000261842	1
ENSG00000081026	MAGI3	ENST00000477955	1
ENSG00000081051	AFP	ENST00000508838	1
ENSG00000081154	PCNP	ENST00000265260	1
ENSG00000081181	ARG2	ENST00000261783	1
ENSG00000081237	PTPRC	ENST00000348564	1
ENSG00000081307	UBA5	ENST00000464068	1
ENSG00000081692	JMJD4	ENST00000366758	1
ENSG00000081760	AACS	ENST00000441247	1
ENSG00000081803	CADPS2	ENST00000397721	1
ENSG00000081853	PCDHGA2	ENST00000394576	1
ENSG00000081923	ATP8B1	ENST00000589147	1
ENSG00000082126	MPP4	ENST00000315506	1
ENSG00000082146	STRADB	ENST00000194530	1
ENSG00000082153	BZW1	ENST00000419090	1
ENSG00000082258	CCNT2	ENST00000264157	1
ENSG00000082269	FAM135A	ENST00000361499	1
ENSG00000082293	COL19A1	ENST00000483745	1
ENSG00000082397	EPB41L3	ENST00000578618	1
ENSG00000082482	KCNK2	ENST00000486921	1
ENSG00000082497	SERTAD4	ENST00000482421	1
ENSG00000082515	MRPL22	ENST00000265229	1
ENSG00000082641	NFE2L1	ENST00000357480	1
ENSG00000082684	SEMA5B	ENST00000449546	1
ENSG00000082898	XPO1	ENST00000436018	1
ENSG00000082996	RNF13	ENST00000466795	1
ENSG00000083097	DOPEY1	ENST00000237163	1
ENSG00000083123	BCKDHB	ENST00000320393	1
ENSG00000083168	KAT6A	ENST00000463961	1
ENSG00000083223	ZCCHC6	ENST00000277141	1
ENSG00000083290	ULK2	ENST00000571177	1
ENSG00000083307	GRHL2	ENST00000517674	1
ENSG00000083312	TNPO1	ENST00000515483	1
ENSG00000083457	ITGAE	ENST00000570360	1
ENSG00000083544	TDRD3	ENST00000463109	1
ENSG00000083642	PDS5B	ENST00000315596	1
ENSG00000083828	ZNF586	ENST00000391702	1
ENSG00000084090	STARD7	ENST00000462501	1
ENSG00000084112	SSH1	ENST00000326495	1
ENSG00000084652	TXLNA	ENST00000373609	1
ENSG00000084676	NCOA1	ENST00000493773	1
ENSG00000084693	AGBL5	ENST00000451003	1
ENSG00000084733	RAB10	ENST00000264710	1
ENSG00000084754	HADHA	ENST00000461025	1
ENSG00000085063	CD59	ENST00000351554	1
ENSG00000085224	ATRX	ENST00000479487	1
ENSG00000085276	MECOM	ENST00000460814	1
ENSG00000085365	SCAMP1	ENST00000510030	1
ENSG00000085382	HACE1	ENST00000262903	1
ENSG00000085433	WDR47	ENST00000357672	1
ENSG00000085465	OVGP1	ENST00000369732	1
ENSG00000085491	SLC25A24	ENST00000264128	1
ENSG00000085511	MAP3K4	ENST00000366919	1
ENSG00000085563	ABCB1	ENST00000482527	1
ENSG00000085644	ZNF213	ENST00000573771	1
ENSG00000085719	CPNE3	ENST00000523588	1
ENSG00000085788	DDHD2	ENST00000519857	1
ENSG00000085840	ORC1	ENST00000371566	1
ENSG00000085978	ATG16L1	ENST00000492298	1
ENSG00000085982	USP40	ENST00000251722	1
ENSG00000085999	RAD54L	ENST00000371975	1
ENSG00000086061	DNAJA1	ENST00000465677	1
ENSG00000086189	DIMT1	ENST00000199320	1
ENSG00000086200	IPO11	ENST00000325324	1
ENSG00000086205	FOLH1	ENST00000525629	1
ENSG00000086300	SNX10	ENST00000396376	1
ENSG00000086475	SEPHS1	ENST00000327347	1
ENSG00000086544	ITPKC	ENST00000263370	1
ENSG00000086570	FAT2	ENST00000261800	1
ENSG00000086598	TMED2	ENST00000509052	1
ENSG00000086666	ZFAND6	ENST00000561017	1
ENSG00000086712	TXLNG	ENST00000380122	1
ENSG00000086730	LAT2	ENST00000465116	1
ENSG00000086758	HUWE1	ENST00000342160	1
ENSG00000086827	ZW10	ENST00000200135	1
ENSG00000086991	NOX4	ENST00000424319	1
ENSG00000087008	ACOX3	ENST00000356406	1
ENSG00000087088	BAX	ENST00000293288	1
ENSG00000087095	NLK	ENST00000584188	1
ENSG00000087206	UIMC1	ENST00000505229	1
ENSG00000087258	GNAO1	ENST00000262494	1
ENSG00000087269	NOP14	ENST00000314262	1
[truncated: 7,746 more rows]
