# Supplementary material for: ONECUT2 governs the POU6F2-beta-catenin axis to modulate cancer stemness and drives the CCL28-dependent pathway for macrophage polarization in breast cancer
Source: Research Square preprint supplement (doi:10.21203/rs.3.rs-7518380/v1), 2025-10-15
Supplement: Supplementary file 2 [file 732e416f3a344ba979dc6038.docx]

**Table S2 Primer sequences and antibodies**

1. Primer sequences for RT-qPCR analysis

|  | **Forward primer ( 5′ to 3′)** | **Reverse primer ( 5′ to 3′)** |
| --- | --- | --- |
| CCL28 | GTCAGCCCGCACAACCATAC | CCTGTTACTGTTCCTCTTGCCATG |
| CCR3 | GGCAATGTGGTGGTGGTGATG | AATGGAAGGGTGACGAGGAAGAG |
| CCR10 | TTGGTCTCCGTCATCGTGTGG | CCTTCCCGCTGCCCATCC |
| ARG1 | GGACCTGCCCTTTGCTGACATC | TTCTTGACTTCTGCCACCTTGCC |
| IL-10 | GTTGTTAAAGGAGTCCTTGCTG | TTCACAGGGAAGAAATCGATGA |
| CD163 | ATCAACCCTGCATCTTTAGACA | CTTGTTGTCACATGTGATCCAG |
| CD206 | GACGTGGCTGTGGATAAATAAC | CAGAAGACGCATGTAAAGCTAC |
| β-Actin | ACAGAGCCTCGCCTTTGCCG | TTGCACATGCCGGAGCCGTT |

1. Primer sequences for ChIP-PCR analysis

| **Promoter** | **Region** | **Primers** | **Sequence** |
| --- | --- | --- | --- |
| POU6F2 | Site1 | Forward primer | TGTCCACTTCCAATTCACAAA |
| Reverse primer | TCTTAAGGGGTCCCTAATGATTT |
| Site2 | Forward primer | GCACAAAAATCAAAGTCTTAATGG |
| Reverse primer | TCTTCCGCTAAAGGTTTAACAA |
| Site3 | Forward primer | TTCGGTCCTTCATTCTTTGC |
| Reverse primer | GGTCGGGTAGCAATGAGAAA |
| CTNNB1 | Site1 | Forward primer | GCCCTGTAAAAGTGGTTAATCTG |
| Reverse primer | TGGTTGTGGTCACAATTCAAA |
| Site2 | Forward primer | GCCTAGAGAAACTGAATCGATCATA |
| Reverse primer | TCGATTAAGCAGCCTCCAAT |
| Site3 | Forward primer | CCAAAGAAAAATCCCCACAA |
| Reverse primer | CCGCAATTCAACAAGTCCTTA |
| CCL28 | Site1 | Forward primer | TGAAAACATAAAAAGAAATGGGTGAAA |
| Reverse primer | ACACTGGATTTCAAAGACTGGGT |
| Site2 | Forward primer | ACCTGGGAGTTCTGGTTTACAAAT |
| Reverse primer | CAGGGTCACTGTGAGGTGG |
| Site3 | Forward primer | GGAGGAGCCTGGTCTTAAGG |
| Reverse primer | CACAGAGAAAGTGCAGAGGA |

| CCL28 | Forward primer | GGTGCCAGAACATTTCTCTATCGAT |
| --- | --- | --- |
| Reverse primer | CAAGCTTACTTAGATCGCAGATCTC |
| POU6F2 | Forward primer | ACGACTCACTATAGGGAGACC |
| Reverse primer | GCCGCCACTGTGCTGGAT |
| CTNNB1 | Forward primer | CCAGAACATTTCTCTATCGATAGG |
| Reverse primer | GCTTTACCAACAGTACCGG |

1. Primer sequences for dual-luciferase reporter assay
2. siRNAs

| QIAGEN | Negative Control siRNA FlexiTube siRNA | SI03650325 |
| --- | --- | --- |
| QIAGEN | Hs_ONECUT2_7 FlexiTube siRNA | SI04340049 |
| QIAGEN | Hs_ONECUT2_8 FlexiTube siRNA | SI04346384 |
| QIAGEN | Hs_ONECUT2_6 FlexiTube siRNA | SI04181709 |
| QIAGEN | Hs_ONECUT2_4 FlexiTube siRNA | SI00665504 |
| QIAGEN | Hs_POU6F2_9 FlexiTube siRNA | SI05185635 |
| QIAGEN | Hs_POU6F2_6 FlexiTube siRNA | SI04200784 |
| QIAGEN | Hs_POU6F2_5 FlexiTube siRNA | SI03159499 |
| QIAGEN | Hs_POU6F2_1 FlexiTube siRNA | SI00690431 |
| QIAGEN | Hs_CTNNB1_5 FlexiTube siRNA | SI02662478 |
| QIAGEN | Hs_CTNNB1_9 FlexiTube siRNA | SI04379662 |
| QIAGEN | Hs_CTNNB1_8 FlexiTube siRNA | SI04379655 |
| QIAGEN | Hs_CTNNB1_4 FlexiTube siRNA | SI00029750 |

1. Sequences of overexpression plasmids

| CCL28 | Forward | ACTCACTATAGGGAGACCCAAGCTGGCTAGCGCCACCATGCAGCAGAGAGGACTCGCC |
| --- | --- | --- |
| Reverse | AGAATTCCACCACACTGGACTAGTGGATCCGAGCTCGGTACCAAGCTTCTACTTGTCATCGTC |
| POU6F2 | Forward | ACGACTCACTATAGGGAGACC |
| Reverse | GCCGCCACTGTGCTGGAT |

1. Antibodies for western blotting

| Proteintech | CCL28 Polyclonal antibody | 18214-1-AP | 1:1000 |
| --- | --- | --- | --- |
| ABclonal | CCR3 Rabbit pAb | A20253 | 1:1000 |
| Proteintech | CCR10 ployclonal antibody | 22071-1-AP | 1:1000 |
| Proteintech | ONECUT2 Polyclonal antibody | 21916-1-AP | 1:1000 |
| Invitrogen | Pou6f2 Polyclonal Antibody | PA5-148435 | 1:1000 |
| CellSignalingTechnology | β-Catenin Antibody | 9562S | 1:1000 |
| CellSignalingTechnology | Notch1 (D6F11) XP® Rabbit mAb | 4380S | 1:1000 |
| CellSignalingTechnology | Nanog Antibody | 3580S | 1:1000 |
| Proteintech | Lamin B1 Polyclonal antibody | 12987-1-AP | 1:1000 |
| CellSignalingTechnology | Phospho-GSK-3β (Ser9) (D85E12) XP® Rabbit mAb | 5558T | 1:1000 |
| CellSignalingTechnology | GSK-3β (D5C5Z) XP® Rabbit mAb #12456 | 12456T | 1:1000 |
| CellSignalingTechnology | GAPDH (14C10) Rabbit mAb | 2118S | 1:1000 |

1. Antibodies for IHC

| Proteintech | ONECUT2 Polyclonal antibody | 21916-1-AP | 1:600 |
| --- | --- | --- | --- |
| Invitrogen | Pou6f2 Polyclonal Antibody | PA5-148435 | 1:100 |
| CellSignalingTechnology | β-Catenin Antibody | 9562S | 1:1000 |
| Proteintech | CCL28 Polyclonal antibody | 18214-1-AP | 1:200 |

1. Antibodies for mIHC

| Proteintech | ONECUT2 Polyclonal antibody | 21916-1-AP | 1:200 |
| --- | --- | --- | --- |
| Invitrogen | Pou6f2 Polyclonal Antibody | PA5-148435 | 1:100 |
| CellSignalingTechnology | β-Catenin Antibody | 9562S | 1:100 |
| Sigma-Aldrich | Monoclonal anti-cytokeratin, PAN (mixture). | C2562 | 1:1000 |

1. Antibodies for flow cytometry

| Invitrogen™ | LIVE/DEAD™ Fixable Near IR (780) Viability Kit, for 633 nm excitation | L34994 |
| --- | --- | --- |
| biolegend | APC anti-mouse CD45 | 103112 |
| biolegend | PerCP/Cyanine5.5 anti-mouse CD3 | 100218 |
| biolegend | PE/Cyanine7 anti-mouse/human CD11b | 101215 |
| biolegend | Brilliant Violet 510™ anti-mouse CD4 | 100559 |
| biolegend | FITC anti-mouse F4/80 | 123107 |
| biolegend | PE/Cyanine7 anti-mouse CD8a | 100721 |
| biolegend | FITC anti-mouse CD19 | 152403 |
| biolegend | PE anti-mouse CD49b (pan-NK cells) | 108907 |
| biolegend | Brilliant Violet 421™ anti-mouse FOXP3 | 126419 |
| biolegend | PE anti-mouse CD163 | 155307 |
| biolegend | Zombie NlR" Fixable Viability Kit | 423106 |
| biolegend | PerCP/Cyanine5.5 anti-human CD68 Antibody | 333814 |
| biolegend | APC anti-human CD163 Antibody | 326510 |
| BD Biosciences | PE Mouse Anti-Human CD24 | 555428 |
| biolegend | PerCP/Cyanine5.5 anti-mouse/human CD44 Antibody | 103032 |

1. Antibodies for Co-IP

| CellSignalingTechnology | Rabbit (DA1E) mAb IgG XP® Isotype Control | 3900S |
| --- | --- | --- |
| Proteintech | ONECUT2 Polyclonal antibody | 21916-1-AP |
