# Supplementary material for: ONECUT2 governs the POU6F2-beta-catenin axis to modulate cancer stemness and drives the CCL28-dependent pathway for macrophage polarization in breast cancer
Source: Research Square preprint supplement (doi:10.21203/rs.3.rs-7518380/v1), 2025-10-15
Supplement: Supplementary file 3 [file 83f3c650439b3795864947d9.docx]

**Supplementary Information**

**Figure S1** The transcriptional regulation of CTNNB1 by ONECUT2.

**Figure S2** Representative images of tumor spheres.

**Figure S3** Representative images from the FCM analysis of BALB/c tumor models.

**Figure S4** Representative images of FCM analysis in THP-1-derived macrophages.

**Figure S5** ELISA assay for CCL28 secretion.

**Figure S6** Gene expression changes in THP-1-derived macrophages treated with MDA-231-conditioned supernatant.

**Table S1** Patient clinical parameters and their association with ONECUT2, POU6F2 and beta-catenin gene expression.

**Table S2** Primer sequences and antibodies.

**Table S3** The potential target genes of ONECUT2 using the GTRD.


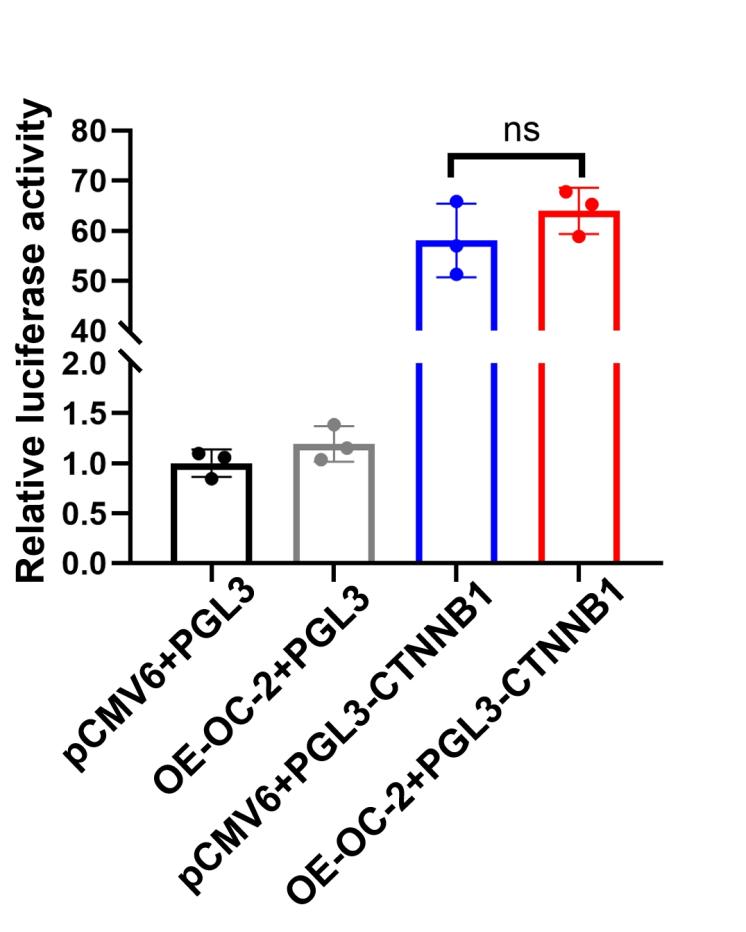


**Figure S1 The transcriptional regulation of CTNNB1 by ONECUT2.** Dual-luciferase reporter assays were used to assess transcriptional regulation of CTNNB1 by ONECUT2 (ns:P＞0.05, *P<0.05, **P<0.01, ***P<0.001).


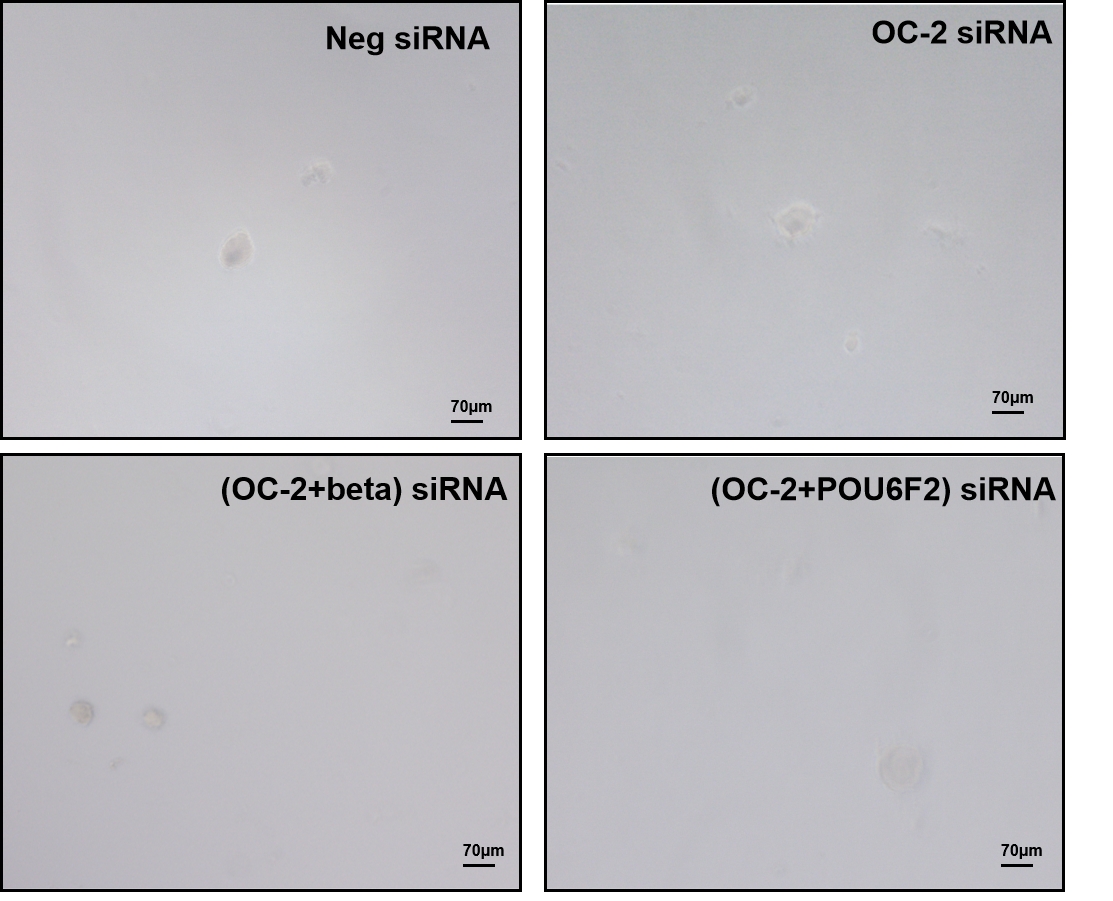


**Figure S2 Representative images of tumor spheres.**

MCF-7 cells were transfected with a control siRNA, siONECUT2, or mixed siRNAs (ONECUT2 plus beta-catenin or ONECUT2 plus POU6F2), and collected for sphere formation assay. Scale bar: 70 μm.


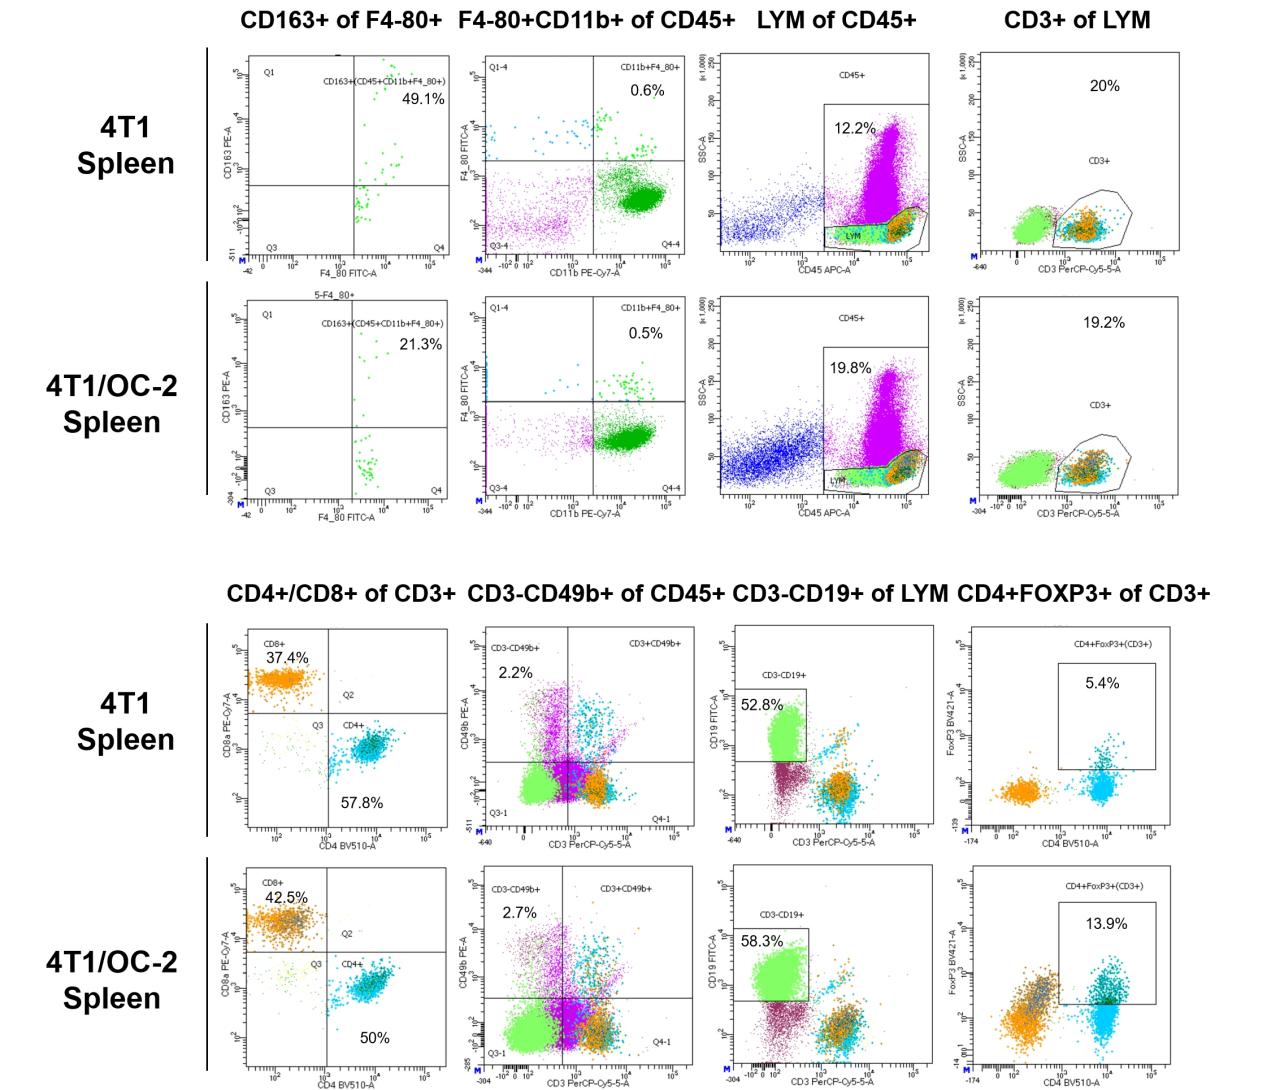


**Figure S3 Representative images from the FCM analysis of BALB/c tumor models.**

The percentages of immunocytes (M2-type macrophages, macrophages, CD3+T cells, CD4+T cells, CD8+T cells, NK cells, B cells, and Tregs) in the spleen tissues from 4T1/OC-2 or 4T1 mice were elevated by FCM analysis.


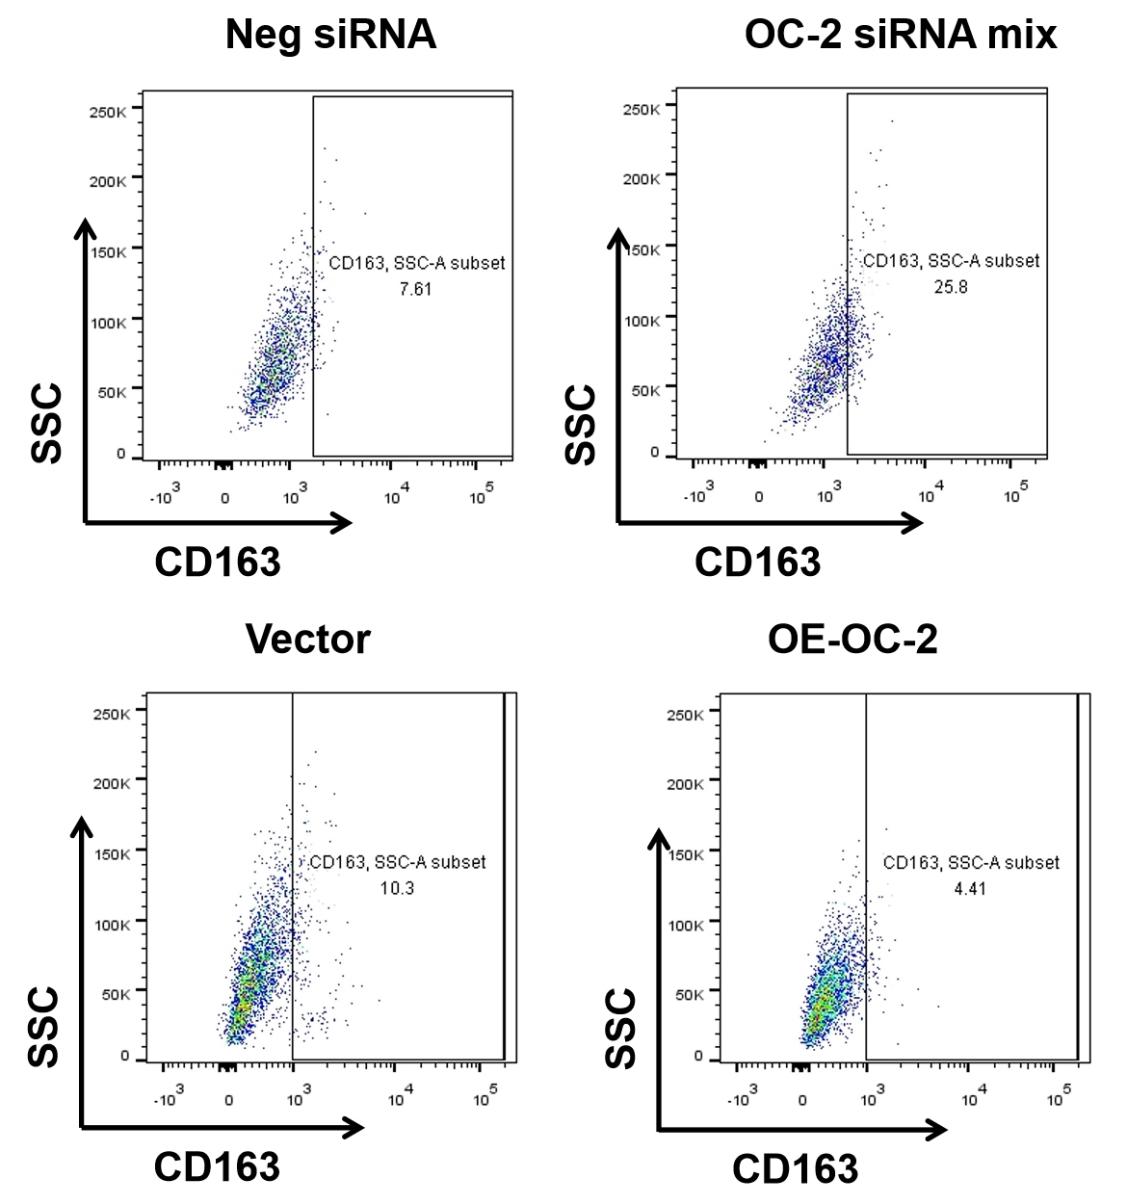


**Figure S4 Representative images of FCM analysis in THP-1-derived macrophages.**

THP-1 cells were co-cultured with MDA-231-conditioned supernatant, and the CD163+CD68+ population was assessed by FCM analysis.


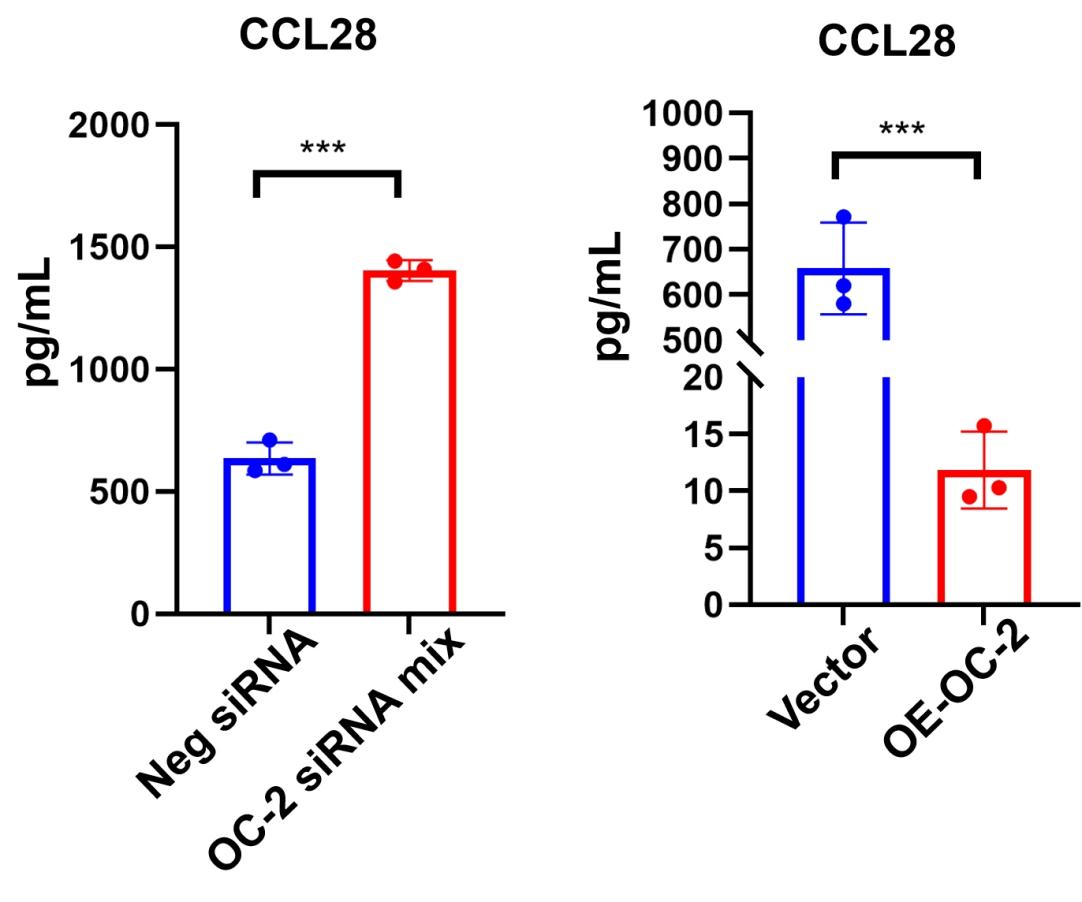


**Figure S5 ELISA assay for CCL28 secretion.**

ELISA were performed to test the secretion of CCL28 by MDA-231 cells transfected with ONECUT2 siRNAs or an overexpression plasmid. Error bars represent mean ± SD of three independent experiments. *P<0.05, **P<0.01, ***P<0.001.


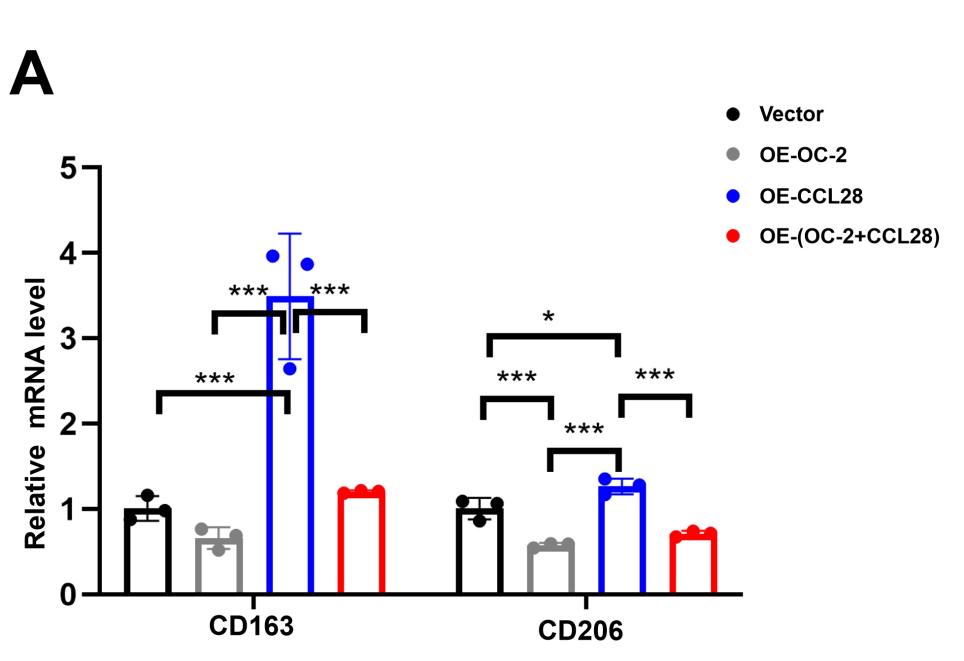


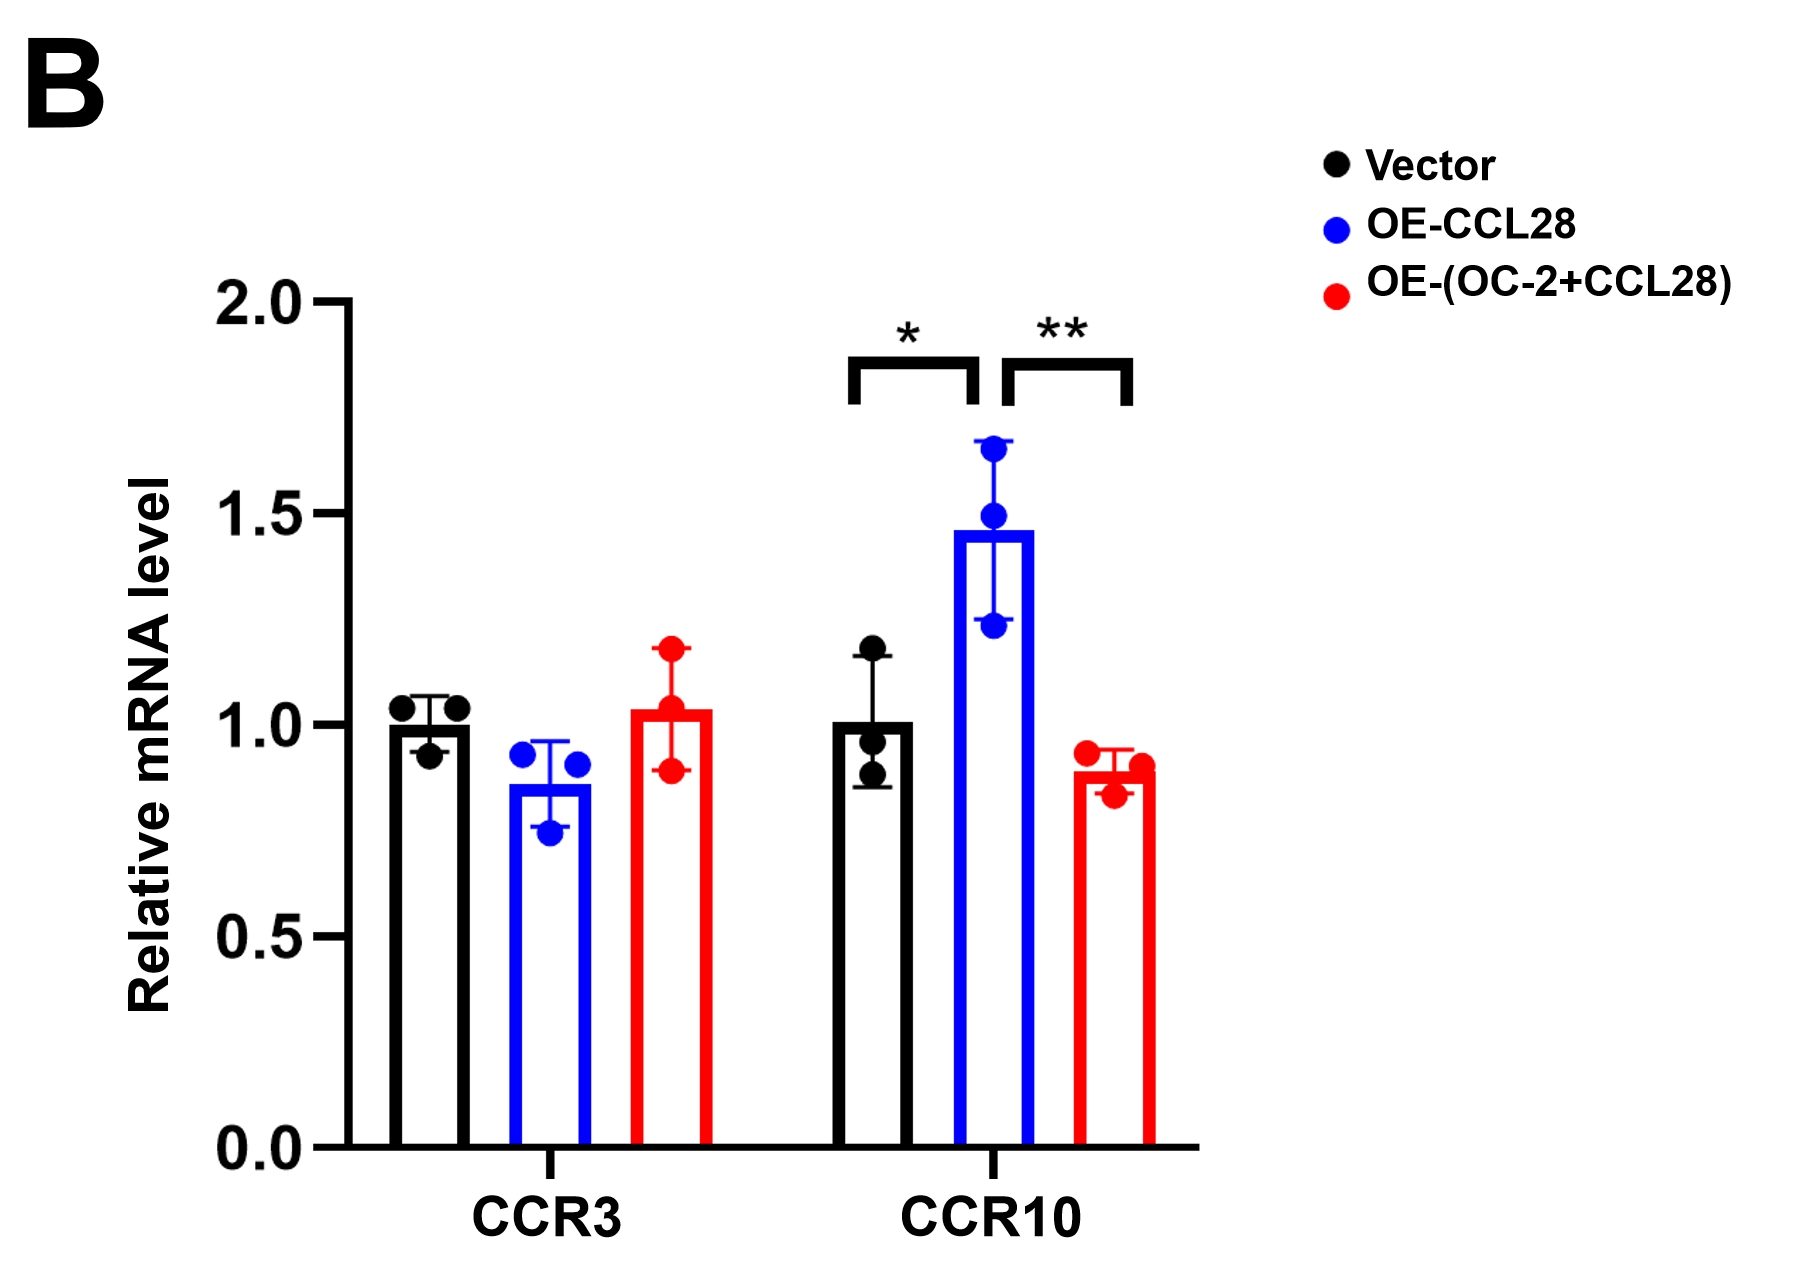


**Figure S6 Gene expression changes in THP-1-derived macrophages treated with MDA-231-conditioned supernatant.**

RT-qPCR analysis for the mRNA levels of CD163 and CD206 (A), or CCR3 and CCR10 (B) in THP-1 cells treated with MDA-231-conditioned supernatant. Error bars represent mean ± SD of three independent experiments. *P<0.05, **P<0.01, ***P<0.001.
