# Supplementary material for: ONECUT2 governs the POU6F2-beta-catenin axis to modulate cancer stemness and drives the CCL28-dependent pathway for macrophage polarization in breast cancer
Source: Research Square preprint supplement (doi:10.21203/rs.3.rs-7518380/v1), 2025-10-15
Supplement: Supplementary file 4 [file a023d4a924867b80b2e5da2a.xlsx]

## Sheet: Table1
Table 1
Univariate survival analysis of clinical parameters and 3 gene expression
with DFS and OS in breast cancer patients
					DFS		OS
					Hazard Ratio		Hazard Ratio
Clinical parameters			n		(95%CI)	p-Value	(95%CI)	p-Value
Age(years)
	≤50		35		1.395	0.4311	3.124	0.0286*
	＞50		64		(0.6325~3.076)		(1.355~7.204)
Clinical stage
	I+IIA		57		2.478	0.0196*	2.329	0.0412*
	IIB~IIIC		42		(1.128~5.445)		(1.012~5.364)
T classification
	T1		36		0.7215	0.4084	1.042	0.9259
	T2+T3		63		(0.3216~1.619)		(0.4439~2.444)
N classification
	N0		54		2.18	0.0471*	1.957	0.1092
	N1+N2+N3		45		(1.001~4.747)		(0.8593~4.455)
ER
	Negative		41		0.6578	0.282	0.3561	0.0136*
	Positive		58		(0.2998~1.443)		(0.1547~0.8201)
PR
	Negative		54		0.8454	0.6719	0.3109	0.0144*
	Positive		45		(0.3912~1.827)		(0.1371~0.7049)
HER2
	Negative		88		1.167	0.8007	0.9301	0.9219
	Positive		11		(0.3251~4.192)		(0.2275~3.802)
ONECUT2
	Low		38		0.1868	<0.0001***	0.4423	0.0455*
	High		61		(0.08281~0.4214)		(0.1893~1.034)
POU6F2
	Low		59		4.106	0.0003**	3.374	0.0031**
	High		40		（1.838~9.172）		(1.438~7.917)
beta-catenin
	Low		53		2.952	0.0074**	1.371	0.4479
	High		46		(1.359~6.413)		(0.6020~3.120)
Abbreviation: ER=estrogen receptor; PR=progesterone receptor; HER2:
human epidermal growth factor receptor 2; *p < 0.05, **p < 0.01 and ***p < 0.001.
