# Supplementary material for: ONECUT2 governs the POU6F2-beta-catenin axis to modulate cancer stemness and drives the CCL28-dependent pathway for macrophage polarization in breast cancer
Source: Research Square preprint supplement (doi:10.21203/rs.3.rs-7518380/v1), 2025-10-15
Supplement: Supplementary file 5 [file a0f002f03afabcce0c6c7c69.xlsx]

## Sheet: Table S1
Table S1
Patient clinical parameters and their association with ONECUT2, POU6F2 and
beta-catenin gene expression
Clinical				ONECUT2			POU6F2			beta-catenin
parameters			n(%)	Low	High	p-Value	Low	High	p-Value	Low	High	p-Value
Age(years)
	≤50		35(35.4)	14	21	0.807	23	12	0.359	17	18	0.464
	＞50		64(64.6)	24	40		36	28		36	28
Clinical stage
	I		20(20.2)	3	17	0.089	16	4	0.0159*	11	9	0.705
	IIA		37(37.4)	15	22		25	12		22	15
	IIB		11(11.1)	4	7		7	4		6	5
	IIIA		27(27.3)	13	14		10	17		13	14
	IIIC		4(4.0)	3	1		1	3		1	3
T classification													`
	T1		36(36.4）	12	24	0.163	22	14	0.942	16	20	0.379
	T2		61(61.6)	24	37		36	25		36	25
	T3		2(2.0)	2	0		1	1		1	1
N classification
	N0		54(54.6)	16	38	0.156	38	16	0.011*	32	22	0.493
	N1		14(14.1)	6	8		10	4		7	7
	N2		27(27.3)	13	14		10	17		13	14
	N3		4(4.0)	3	1		1	3		1	3
ER
	Negative		41(41.4)	16	25	0.912	25	16	0.814	24	17	0.402
	Positive		58(58.6)	22	36		34	24		29	29
PR
	Negative		54(54.5)	21	33	0.91	31	23	0.627	29	25	0.971
	Positive		45(45.5)	17	28		28	17		24	21
HER2
	Negative		88(88.9)	35	53	0.422	51	37	0.347	45	43	0.176
	Positive		11(11.1)	3	8		8	3		8	3
Abbreviation: ER=estrogen receptor; PR=progesterone receptor; HER2: human epidermal
growth factor receptor 2; *p < 0.05.
